1  
2  
3  
4  
5  
6  
7  
8  
9  
10  
11  
12  
13  
14  
15  
16  
17  
18  
19  
20  
21  
22  
23

Effect of error and missing data on population structure inference using microsatellite data

Patrick A. Reeves<sup>1,4</sup>, Cheryl L. Bowker<sup>2</sup>, Christa E. Fettig<sup>2</sup>, Luke R. Tembrock<sup>3</sup>, and Christopher  
M. Richards<sup>1</sup>

<sup>1</sup>United States Department of Agriculture, Agricultural Research Service, National Laboratory  
for Genetic Resources Preservation, 1111 South Mason Street, Fort Collins, CO, 80521,  
U.S.A.

<sup>2</sup>Department of Bioagricultural Sciences and Pest Management, Colorado State University, Fort  
Collins, CO, 80523

<sup>3</sup> Department of Biology, Colorado State University, Fort Collins, CO, 80523

<sup>4</sup>Corresponding author (pat.reeves@ars.usda.gov; phone: 970-492-7611; fax: 970-492-7605).

Keywords: Bayesian inference, coalescent simulation, Hardy-Weinberg equilibrium, multilocus  
genotype, neighbor-joining, principal coordinate analysis

Running title: Effect of error and missing data.

24  
25  
26  
27  
28  
29  
30  
31  
32  
33  
34  
35  
36  
37  
38  
39  
40  
41  
42  
43

## ABSTRACT

Missing data and genotyping errors are common in microsatellite data sets. We used simulated data to quantify the effect of these data aberrations on the accuracy of population structure inference. Data sets with complex, randomly-generated, population histories were simulated under the coalescent. Models describing the characteristic patterns of missing data and genotyping error in real microsatellite data sets were used to modify the simulated data sets. Accuracy of ordination, tree-based, and model-based methods of inference was evaluated before and after data set modifications. The ability to recover correct population clusters decreased as missing data increased. The rate of decrease was similar among analytical procedures, thus no single analytical approach was preferable. For every 1% of a data matrix that contained missing genotypes, 2–4% fewer correct clusters were found. For every 1% of a matrix that contained erroneous genotypes, 1–2% fewer correct clusters were found using ordination and tree-based methods. Model-based procedures that minimize the deviation from Hardy-Weinberg equilibrium in order to assign individuals to clusters performed better as genotyping error increased. We attribute this surprising result to the inbreeding-like nature of microsatellite genotyping error, wherein heterozygous genotypes are mischaracterized as homozygous. We show that genotyping error elevates estimates of the level of genetic admixture. Overall, missing data negatively impact population structure inference more than typical genotyping errors.

## INTRODUCTION

Short, repetitive regions of the genome, known as microsatellite DNA, simple sequence repeats (SSRs), or short tandem repeats (STRs), are commonly used in molecular population genetic studies (Sunnucks 2000; Guichoux *et al.* 2011). SSR loci exhibit a unique mutational

47 mechanism, slipped-strand mispairing, which causes the duplication or deletion of repeat units,  
48 resulting in sequence length variation among alleles (Levinson & Gutman 1987). SSR mutation  
49 rates vary widely depending on organism, repeat length, and repeat number, but are generally  
50  $1E3$ – $1E4$  times higher than a typical nucleotide substitution rate of  $1E-8$  per generation (Dallas  
51 1992; Chakraborty *et al.* 1997; Vigouroux *et al.* 2002), thus SSR regions provide highly  
52 polymorphic markers, useful for distinguishing individuals, reconstructing population history,  
53 and estimating demographic parameters.

54 While single nucleotide polymorphisms (SNPs) may gradually supplant SSRs for certain  
55 population genetic applications (Brumfield *et al.* 2003), SSRs remain popular. Over 3500 papers  
56 that utilized SSRs were published in 2009 (Guichoux *et al.* 2011), and in 2013–2015, ~33% of  
57 articles in the journal *Molecular Ecology* included SSRs as a primary data source. SSR  
58 development and typing costs have dropped due to next generation sequencing (Gardner *et al.*  
59 2011) and improved multiplexing protocols (Butler 2005; Holleley and Geerts 2009). We expect  
60 SSRs to remain in use due to low cost and their ability to outperform SNPs with fewer loci for  
61 individual identification (Seddon *et al.* 2005); parentage and sibship analysis (Glaubitz *et al.*  
62 2003; Wang & Santure 2009); and population structure inference (Liu *et al.* 2005; Glover *et al.*  
63 2010).

64 Most SSR data sets contain missing data and erroneous genotypes. Missing data are  
65 entered into an SSR data matrix when a particular sample does not produce an interpretable  
66 pattern of DNA fragments after PCR amplification. PCR failure is usually caused by poor  
67 quality template DNA or improper PCR conditions, including mispriming due to mutations at  
68 primer binding sites (Guichoux *et al.* 2011). The frequency of missing data is elevated across  
69 loci for samples with poor quality DNA. Suboptimal PCR conditions increase missing data

70 across samples for specific loci. Consequently, missing genotypes typically occur non-randomly  
71 in data matrices, clumped in rows or columns. Missing data can be minimized by re-extracting  
72 DNA and repeating amplifications for problematic individuals, redesigning troublesome primers  
73 and optimizing PCR conditions, or excluding individuals and loci with high failure rates from the  
74 matrix.

75         SSR genotyping errors arise from three main sources: the occurrence of null alleles at a  
76 locus, preferential amplification of small DNA targets during PCR, and stuttered visualization of  
77 amplification products (DeWoody *et al.* 2006; Guichoux *et al.* 2011). “Null alleles” are  
78 genotypic variants that fail to amplify under the conditions specified for the locus. They often  
79 occur due to mutations at primer binding sites that inhibit amplification but may also arise from  
80 poor template quality. Because nothing is amplified, null alleles, by definition, cannot be  
81 observed and are not scored. Consequently, in diploid organisms, the genotype entered into the  
82 data matrix becomes—erroneously—homozygous for the other, visible allele, or, if both alleles  
83 are nulls, missing data. Several analytical approaches have been devised to detect null alleles  
84 and estimate their frequency (Chakraborty *et al.* 1992; Raymond & Rousset 1995; Van  
85 Oosterhout *et al.* 2004; Kalinowski *et al.* 2007) although only about 40% of studies use them  
86 (Guichoux *et al.* 2011). In most cases, eliminating null alleles requires primer redesign outside  
87 of highly mutable regions (Dakin & Avise 2004; Chapuis & Estoup 2007).

88         Preferential amplification of short DNA sequences causes “large allele dropout” error.  
89 All else equal, short sequences are more efficiently amplified than long. In a heterozygote with  
90 differently-sized alleles this bias may prevent the signal for the large allele from rising above the  
91 detection threshold, with the consequence that a heterozygous genotype will be erroneously  
92 scored as homozygous for the smaller allele (Wattier *et al.* 1998; Björklund 2005). Large allele

93 dropout can be mitigated in some cases by excluding loci where amplicons exceed 200 bp (Sefc  
94 *et al.* 2003).

95 Slipped-strand mispairing during PCR results in the production of shadow peaks around  
96 the amplified allele (Murray *et al.* 1993), a phenomenon termed “stutter”. Stutter peaks are  
97 usually smaller than the target, and deviate in size by multiples of the repeat unit length, with  
98 progressively decreasing signal (Shinde *et al.* 2003). As with other types of error, stutter causes  
99 heterozygotes to be scored as homozygous, but always for the larger of the two alleles, and only  
100 when the alleles differ in size by a single repeat unit. Stutter can be reduced by avoiding SSRs  
101 with dinucleotide repeats (Chambers & MacAvoy 2000), decreasing denaturation temperature  
102 (Olejniczak & Krzyzosiak 2006), and using highly processive polymerases (Davidson *et al.*  
103 2003).

104 The final assembly of an SSR data set requires considerable care. Filling all cells in a  
105 data matrix is time consuming; poor-performing loci must be optimized and recalcitrant  
106 individuals must be extracted and genotyped repeatedly. Consequently, the typical course for  
107 dealing with missing data is to eliminate problematic individuals or loci. This can produce  
108 biased sampling because the frequency of missing data may be similar in related populations  
109 (Amos 2006). Some authors have recommended that error rates be reported and efforts made to  
110 assess the reliability of conclusions given uncertainty in the genotypes (Bonin *et al.* 2004;  
111 Broquet & Petit 2004; Hoffman & Amos 2005). This practice is increasing—error rate estimates  
112 can be found in about a quarter of published papers (Guichoux *et al.* 2011)—but it requires  
113 sample replication and extensive post-genotyping data analysis, increasing costs. If missing data  
114 and genotyping error were to impact the accuracy of population structure inference in only minor  
115 ways these steps might be avoided.

116 The effect of missing data and error on linkage mapping (Hackett & Broadfoot 2003),  
117 parentage analysis (Dakin & Avise 2004; Hoffman & Amos 2005; Kalinowski *et al.* 2007), and  
118 the estimation of population genetic parameters (Chapuis & Estoup 2007; Hall *et al.* 2012; Peel  
119 *et al.* 2013) has been studied in detail, but there have been few investigations of the effect on  
120 population structure inference (Pompanon *et al.* 2005; Carlsson 2008; Chapuis *et al.* 2008). In  
121 this study we seek to quantify the extent to which missing data or genotyping error impact  
122 population structure inference, to assist researchers in developing strategies to produce SSR data  
123 sets that maximize accuracy while minimizing costs.

124

125

## MATERIALS AND METHODS

126

127

128

129

130

131

132

133

134

135

136

137

138

Highly polymorphic, neutral marker data were simulated using a coalescent model and the software MSMS (Ewing & Hermisson 2010). The simulation approach is detailed in Reeves *et al.* (2012). Briefly, 1E4 data sets were generated, each containing 500 diploid individuals equally distributed among 50 populations, and 50 unlinked loci. An asymmetric island migration model was created by randomly assigning migration rates between populations. The population scaled mutation rate ( $\theta$ ) was varied from 0–0.5. The underlying mutation model of MSMS is an infinite sites model. Unique binary strings output by MSMS were converted into uniquely named alleles following Huelsenbeck and Andolfatto (2007), rendering the infinite sites model as an infinite allele model. We used an infinite allele model instead of a stepwise mutation model as an expedient, and because it is not clear the extent to which the stepwise mutation model fits real SSR data (Gaggiotti *et al.* 1999). It is not unusual for SSR data sets to better fit an infinite allele model than stepwise mutation (e.g. Estoup *et al.* 1995; O’Connell *et al.* 1997). The primary defining feature of real SSR data is a limited number of alleles per locus (Paetkau *et*

139 *al.* 1997). Therefore, data sets containing levels of polymorphism comparable to typical SSR  
140 loci (on average < 30 alleles per locus, following Kalinowski 2002) were subsampled from the  
141 original 1E4 data sets. A total of 1367 were found and used for further analysis.

142 Simulated data sets were altered to include missing or erroneous genotypes using models  
143 describing the distribution of these data aberrations in typical SSR data sets. In the missing data  
144 model, the percent of the matrix containing missing data was varied between zero and 25. A  
145 “clumping” parameter was used to bias placement of missing genotypes towards certain loci or  
146 individuals. The clumping parameter was varied among data sets from zero, which caused a  
147 uniform distribution of missing data, to ten, which elevated the probability ten-fold that the next  
148 missing genotype would occur in a row or column already containing missing data. Missing  
149 genotypes were substituted for known genotypes one by one, with the probability of conversion  
150 for each row and column adjusted after each substitution using the clumping parameter, until the  
151 specified percentage of missing data was reached.

152 To create data sets that varied in their propensity to contain null alleles, a  
153 data-set-specific maximum null allele frequency parameter ( $v_d$ ) was defined, and selected at  
154 random from 0 to 20 percent, following Dakin and Avise (2004). Within each data set, the  
155 locus-specific null allele frequency parameter ( $v_l$ ) was chosen at random from 0 to  $v_d$  for each  
156 locus. The number of null alleles per locus was then defined as  $v_l$  multiplied by the number of  
157 distinct alleles at the locus, with the alleles that were to act as nulls chosen randomly. Alleles  
158 defined as nulls were treated as unknown, with the consequence that heterozygous genotypes  
159 became homozygous for the non-null allele, and homozygous null genotypes became missing  
160 data, in the modified data set.

161 To simulate large allele dropout, it was necessary to assign a probability of dropout for  
162 each allele that was proportional to its size. A locus-specific maximum probability of dropout  
163 ( $\delta_l$ ) was chosen at random for each locus from 0 to  $\delta_d$ , the data-set-specific dropout probability.  
164 The ceiling on  $\delta_d$  was set to 0.5 based on empirical studies (Taberlet *et al.* 1996; Gagneux *et al.*  
165 1997; Buchan *et al.* 2005). We assumed a curvilinear function relating dropout probability to  
166 allele size, with the largest allele at each locus having a dropout probability of  $\delta_l$ . Coalescent  
167 simulations only provide information on allelic state, not allele size, so relative allele sizes ( $\sigma_a$ )  
168 were assigned to all alleles for each locus by randomly sampling an exponential distribution with  
169 rate parameter  $\lambda$ , varied by locus from 0 to 10. The probability of retention (i.e. the probability  
170 that an allele does not drop out) was then computed for each allele as one minus the cumulative  
171 distribution function of the exponential (CDF =  $1 - e^{-\lambda\sigma_a}$ ) rescaled to have a maximum value of  
172  $\delta_l$ . In this way, data sets exhibited varying levels of overall “dropout proneness” governed by the  
173 parameter  $\delta_d$ . Within data sets, the largest alleles at a locus always had the highest dropout  
174 probability, but some loci were characterized by dropout probabilities that declined uniformly  
175 with consecutively smaller allele size (when  $\lambda \rightarrow 0$ ), while others approximated a threshold effect  
176 where alleles above a particular size were highly dropout prone (when  $\lambda \rightarrow 10$ ). If a uniform  
177 random number from 0 to 1 exceeded the probability of retention, the allele was made to drop  
178 out, and the data set was modified accordingly. Thus, the effect of simulated large allele dropout  
179 was to convert heterozygous genotypes to small allele homozygotes with probability  $\delta_l(1 -$   
180  $e^{-\lambda\sigma_a})$ .

181 To model stutter error, we identified all heterozygotes having consecutively-sized alleles  
182 using the arbitrary sizes from the large allele dropout model. These genotypes are called  
183 “adjacent-allele heterozygotes” (Hoffman & Amos 2005). Stutter error could only affect these



184 genotypes, but was not assumed to affect all of them. A model was developed to assign a  
185 “probability of stutter error occurrence” to each adjacent-allele heterozygous genotype, thus  
186 permitting us to vary the “stutter error proneness” between data sets and among loci. A  
187 data-set-specific average probability of stutter error at adjacent-allele heterozygotes ( $\overline{\tau}_d$ ) was  
188 randomly chosen from zero to one.  $\widetilde{\tau}_d$ , the standard deviation of  $\overline{\tau}_d$ , was randomly set from zero  
189 to one. The locus-specific probability of stutter error,  $\tau_l$ , was sampled from the normal  
190 distribution defined by  $\overline{\tau}_d$  and  $\widetilde{\tau}_d$ . The conversion of adjacent-allele heterozygotes into  
191 large-allele homozygotes then occurred with probability  $\tau_l$ , the locus-specific conversion  
192 probability.

193 Genotypes in the unmodified matrices were altered in the order that errors would arise  
194 during the genotyping process. Null allele errors, which are caused by mispriming, were added  
195 first, followed by large allele dropout errors, caused by poor amplification, then by stutter errors,  
196 caused by slippage during amplification but attributable primarily to poor scoring procedures.  
197 Realized error rates were then recalculated for each error type, for each data set.

198 Three categorically-distinct analytical approaches for inferring population structure were  
199 used. First, we applied a class of Bayesian Markov chain Monte Carlo (MCMC) methods  
200 introduced by Pritchard *et al.* (2000) in the software STRUCTURE. To avoid *ad hoc* model  
201 selection procedures for determining the number of populations (K) (Evanno *et al.* 2005), we  
202 used INSTRUCT v1.0 (Gao *et al.* 2007) and STRUCTURAMA v1.0 (Huelsenbeck and  
203 Andolfatto 2007) instead of STRUCTURE. For INSTRUCT analyses, we used no-admixture  
204 (mode 0) and admixture (mode 1) models, as well as a model that estimates individual  
205 inbreeding coefficients simultaneously with individual assignment (mode 5). Modes 0 and 1 of  
206 INSTRUCT are comparable to no-admixture and admixture models of STRUCTURE. A single

207 Markov chain was run for  $1E5$  generations and sampled every 25, with the initial 12500  
208 generations discarded. The deviance information criterion (DIC) was used to determine the best  
209 value of  $K$  between 1 and 50 (Gao *et al.* 2011). A discrete assignment was created by assigning  
210 individuals to clusters based on the highest assignment probability in the Q-matrix.

211 STRUCTURAMA estimates  $K$  alongside individual assignment. Chains were run as for  
212 INSTRUCT, the prior on number of populations was set to two, and no admixture was allowed.

213 Second, we used a tree-based approach. Neighbor-joining (NJ) trees were constructed  
214 using NTSYS (Rohlf 2008). Inter-individual distances were computed using Lynch's (1990)  
215 band sharing coefficient. Populations were counted as correctly inferred when they existed as a  
216 monophyletic group in the resulting tree. Third, an ordination method was applied. We used  
217 PCOMC, a procedure that couples ordination with cluster analysis to simultaneously determine  
218 population number and membership (Reeves & Richards 2009). Principal coordinate analysis  
219 was performed using NTSYS. Distance matrices, computed as for NJ, were double-centered  
220 prior to the calculation. Principal coordinate values were weighted according to their  
221 contribution to the total variance, then subject to the density clustering algorithm PROC  
222 MODECLUS (SAS Institute, Cary, NC).

223 Correct and incorrect clusters resulting from application of each analytical method to  
224 each data set were counted. Correct clusters were those that contained all 10 individuals that  
225 belonged to a single population as specified in the coalescent simulation model, and no others.  
226 Incorrect clusters contained some, but not all, members of a population in the model, or  
227 individuals from more than one population. The "performance ratio" was defined as the number  
228 of correct clusters resulting from analysis of a modified data set divided by the number of correct  
229 clusters in the unmodified data set from which it was derived. A performance ratio  $< 1$  indicates

230 that data modification reduces accuracy, while a performance ratio  $> 1$  indicates improved  
231 accuracy. We used the partition distance of Gusfield (2002) as a second, less strict measure of  
232 accuracy for methods that produce partitions (INSTRUCT and STRUCTURAMA). The  
233 partition distance ( $PD$ ) has been used previously for this purpose, and is useful because it can  
234 quantify partially correct matches between clusters, unlike the performance ratio (Huelsenbeck  
235 and Andolfatto 2007; Choi and Hey 2011). It is defined as the number of elements that must be  
236 moved between clusters to make one partition identical to another. We normalized the  $PD$  to the  
237 range 0–1 by dividing by the maximum possible  $PD$  (Charon *et al.* 2006), calling the result  $PD_n$ .  
238 We define the “partition distance ratio” as  $\frac{1-PD_n^{modified}}{1-PD_n^{unmodified}}$ , where numerator and denominator are  
239 formulated as similarities to simplify comparison with the performance ratio.  $PD_n^{modified}$  is the  
240 normalized partition distance between the partition resulting from analysis of the modified data  
241 and the 50 cluster partition defined in the coalescent simulation model (likewise for  
242  $PD_n^{unmodified}$ ). The performance ratio and the partition distance ratio are non-identical, but  
243 correlated, measures of the accuracy of population structure inference (Supplementary Table 1).  
244 We preferentially report the performance ratio, because its interpretation is intuitive, and it is  
245 applicable to all methods.

246 The false discovery rate ( $FDR$ ) was calculated as the number of incorrect clusters divided  
247 by the total number of clusters returned. A ratio,  $\frac{FDR^{modified}}{FDR^{unmodified}}$ , was calculated to express the  
248 difference in probability of recovering incorrect clusters between modified and unmodified data  
249 sets. Multiple regression and likelihood analysis were used to examine the effect of model  
250 factors on the accuracy of inference.

251

## RESULTS

252  
253 *Data set validation.* The 1367 simulated data sets contained an average of  $14.48 \pm 8.46$  (1 sd)  
254 alleles per locus. Population structures ranged from virtually panmictic to highly subdivided  
255 (Figure 1). Levels of population subdivision, as quantified by Hedrick's (2005)  $G'_{st}$ , varied from  
256 0.006 to 0.999, with an excess of low  $G'_{st}$  values. The degree to which data sets were modified  
257 by the missing data model was not significantly related to the level of population differentiation  
258 ( $r = 0.03$ ,  $p = 0.32$ ); application of the error models resulted in a slight, but significant,  
259 negative correlation between  $G'_{st}$  and the proportion of genotypes modified ( $r = -0.14$ ,  
260  $p < 0.0001$  (Supplementary Figure 1).

261 *Performance.* The analytical methods differed in accuracy when unmodified data sets were  
262 analyzed (Figure 2). For a given level of genetic subdivision, correct clusters were found in NJ  
263 trees at a much higher frequency than in INSTRUCT, STRUCTURAMA or PCOMC analyses.  
264 This is not surprising because the criterion for identifying correct clusters for NJ was less strict  
265 than for other methods—a correct inference occurred when a node existed that defined a  
266 population correctly in the tree, but there was no mechanism to determine which nodes defined  
267 populations. PCOMC had the lowest rate of correct cluster recovery. STRUCTURAMA  
268 recovered more correct clusters and had a lower false discovery rate than INSTRUCT for high  
269 levels of genetic subdivision, while INSTRUCT was more accurate at lower levels, regardless of  
270 mode.

271 To avoid undefined values when calculating the performance ratio, data sets were  
272 excluded when zero correct clusters were inferred with unmodified data. Likewise, for the  
273 partition distance ratio, data sets were excluded when  $PD_n^{unmodified} = 1$ , i.e. when the observed  
274 partition was maximally distant from the simulated partition. Because the coalescent model was

275 complex and population subdivision was often low, a substantial number of data sets were  
276 excluded using this restriction. The total number of useful data sets ranged from 63 to 473,  
277 depending on analytical method, when measured using the performance ratio (Table 1), and 115  
278 to 464 for the partition distance ratio (Supplementary Table 1). Population subdivision in the  
279 excluded data sets was low ( $G'_{st}$  ~5-fold lower than retained data sets), approaching or exceeding  
280 the limits of resolution of the methods applied.

281 Performance decreased in a roughly linear manner as missing data increased (Figure 3a–  
282 f). The slope of the regression line was significantly different from zero (at  $\alpha = 0.01$ ,  
283 Holm-Bonferroni corrected, here and throughout) for all methods except ‘INSTRUCT  
284 inbreeding’ (mode 5) and PCOMC (Table 1).  $R^2_{adj}$  values for significant regressions ranged  
285 from 0.08 to 0.27 and the slope of performance loss ranged from  $m = -1.8$ – $-3.5$  between  
286 analytical approaches (Table 1). The results using the partition distance ratio were similar. A  
287 significant negative correlation was found for ‘INSTRUCT no admixture’ (mode 0) and  
288 ‘INSTRUCT admixture’ (mode 1); the correlation was not significant for ‘INSTRUCT  
289 inbreeding’ or STRUCTURAMA (Supplementary Table 1).

290 Taking into account 95% confidence intervals on the slopes, a data matrix with 5%  
291 missing data is predicted to result in recovery of at least 72–81% of the correct clusters that  
292 could be recovered with a complete data matrix. Based on our data, 95% of recoverable clusters  
293 should be found when data matrices contain, for INSTRUCT, 2.5–2.7% missing data, or, for the  
294 other methods, 1.5–1.6% missing data. The FDR ratio increased significantly ( $\alpha = 0.05$ ) with  
295 missing data for all methods except ‘INSTRUCT inbreeding’ and PCOMC, indicating that, in  
296 addition to fewer correct clusters, users should expect more erroneous clusters as missing data  
297 increase.

298           The clumping parameter had a statistically significant effect on performance for NJ only  
299 (Table 2). Performance of NJ was higher when missing values were more clumped ( $\beta = 0.02$ ).  
300 Using ratios of the Akaike weights, the linear model for percent missing data alone had a much  
301 higher probability ( $10^{25}$ -fold) than the model for clumping parameter for NJ. Regardless of  
302 method, less than 4% of the variance in performance was attributable to clumping—a slight  
303 effect—thus the clumping parameter, despite adding realism to the simulation, was largely  
304 dispensable.

305           The effect of genotyping error differed between categories of analytical method. For  
306 distance methods NJ and PCOMC, performance declined as erroneous data increased (Figure  
307 3k,l). The slopes of the regressions were significantly different from zero and about half the  
308 magnitude found for missing data (Table 1). A matrix with 5% erroneous data should result in  
309 recovery of 85% (NJ) or 82% (PCOMC) of the clusters that would be found if the data set  
310 contained no error. Ninety five percent of recoverable clusters were found when 2.9% (NJ) or  
311 3.6% (PCOMC) of the data matrix was erroneous. For NJ, large allele dropout and stutter had  
312 the greatest effect on deteriorating performance (Table 2).

313           In contrast, accuracy of model based methods improved as erroneous data increased.  
314 When using the performance ratio, the slope of the regression was positive for all methods  
315 (0.41–1.36) (Figures 3g-j, Table 1). The relationship was statistically significant for  
316 STRUCTURAMA. When using the partition distance ratio, a significant positive correlation  
317 was found for all methods (Figure 4, Supplementary Table 1). Large allele dropout was the most  
318 important model effect for INSTRUCT and STRUCTURAMA, explaining 2–10% of the  
319 variation in performance (combined model, 5–16%), and holding 18–78% of the linear models'

320 Akaike weight (model probability). The FDR ratio did not change significantly with increasing  
321 error for any method.

322

## 323 DISCUSSION

324 Genomewide genotyping approaches are gaining popularity for studies of population  
325 structure but SSRs continue to be used due to low cost and high power of inference. Although  
326 SSR data sets are prone to containing missing data and erroneous genotypes, few studies have  
327 examined their impact on analyses of population structure (Pompanon *et al.* 2005). We explored  
328 the effect of missing data and genotyping errors on population structure inference using  
329 model-based Bayesian MCMC procedures (INSTRUCT, STRUCTRAMA), a tree-based  
330 method (NJ), and an ordination approach (PCOMC). Our goal is to provide users of SSRs with  
331 insight for how much missing data and error might be tolerated in order to achieve a desired  
332 level of accuracy.

333 In order to make general recommendations it was necessary to explore a diverse set of  
334 population structures. This was accomplished using coalescent modeling with key parameters—  
335 mutation, migration rates, migration directionality—set stochastically, but within plausible  
336 ranges (Reeves *et al.* 2012). The resultant data sets exhibited a large range of complex  
337 population structures with widely varying levels of subdivision (Figure 1, Supplementary Figure  
338 1). Nevertheless, the extent to which simulated data can ever accurately represent nature is  
339 debatable. We attempted to produce a realistic subsample from the universe of plausible  
340 population structures. Other models describing population divergence exist, most notably the  
341 isolation with migration model (Nielsen & Wakeley 2001). Our conclusions should be

342 interpreted as limited to modified island models similar to those simulated, and should not be  
343 expected to precisely predict outcomes for any single data set.

344 Key properties peculiar to SSR data sets were modeled, including the clumped nature of  
345 missing data, and the three best understood sources of error: null alleles, large allele dropouts,  
346 and stutter artifacts. We did not include an assessment of human error, which contributes  
347 substantially (Bonin *et al.* 2004), but is not easily modeled. While most real data sets will be  
348 affected by both missing data and error, we elected to study these factors independently because  
349 the course of action for mitigation seems distinct.

350 *Impact of missing data.* For data sets modified with missing data three basic observations were  
351 made. First, the degradation of performance as missing data increased was roughly linear  
352 (Figure 3a–f). Second, the rate at which performance declined was similar among methods  
353 (Table 1). Third, the degree to which missing data were clumped by locus or DNA sample was  
354 unimportant (Table 2)—contiguous blocks of missing genotypes did not affect performance  
355 much more than an equal number of randomly-distributed missing genotypes. These  
356 observations lead to a simple prediction: for every 1% of a data matrix that contains missing  
357 data, researchers should expect to recover 2–4% fewer correct clusters than would be inferred  
358 with a complete data set.

359 *Impact of error on distance methods.* Error caused a decline in performance for the tree-based  
360 NJ method and for the ordination approach PCOMC. Researchers should expect a ~2% decrease  
361 in the number of correct clusters recovered for every 1% of the data matrix impacted by error  
362 when using these methods.

363 Although NJ and PCOMC are quite distinct mathematically, the similarity in response  
364 between the methods may arise from their use of the same distance metric. Distance was



365 calculated as  $1 - S_{xy}$ , where  $S_{xy}$  is the ratio of alleles common to two individuals, over the total,  
366 or  $\frac{|A \cap B|}{|A \cup B|}$ , i.e. the Jaccard index (here, A and B represent the sets of unique alleles from each  
367 individual). The mechanism by which performance decreases is loss of precision in the genetic  
368 distance estimate. Conversion of heterozygotes to homozygotes decreases the number of alleles,  
369 lowering  $|A \cup B|$ . The maximum number of distinct values the index can assume,  $|A \cup B| +$   
370 1, also decreases, imposing a limit on the assembly of individuals into different clusters.  
371 Missing data had a stronger effect than error (Figure 3e,f,k,l). Conversion of a heterozygous  
372 locus to missing data may reduce  $|A \cup B|$  by two, whereas with error  $|A \cup B|$  can only  
373 decrease by one, thus the erosion of resolving power is generally more rapid with missing data.  
374 *Impact of error on model-based methods.* We observed a positive relationship between the  
375 amount of error introduced into a data set and the accuracy of inference when using model-based  
376 methods (Figures 3-4, Table 1, Supplementary Table 1). Our data suggest that a matrix  
377 containing 25% erroneous data could cause the recovery of 30–70% more correct clusters than  
378 an error-free matrix. Hereafter, we attempt to explain this unexpected result.

379         When a population consists of several subpopulations, a “heterozygote deficit” occurs,  
380 where the observed heterozygosity of the population analyzed as a whole is lower than predicted  
381 under Hardy-Weinberg equilibrium. This “Wahlund effect” (Wahlund 1928) forms the  
382 theoretical justification, and source of signal, for a class of model-based clustering methods that  
383 includes STRUCTURE, STRUCTURAMA, INSTRUCT, and others (e.g. Dawson and Belkhir  
384 2001; Corander *et al.* 2003), which minimize the deviation from Hardy-Weinberg expectations  
385 by partitioning individuals into distinct subpopulations. Unfortunately, the signal upon which  
386 these methods rely is not uniquely generated by population subdivision. Heterozygote deficit  
387 also occurs as a consequence of selfing or inbreeding (Gao *et al.* 2007). Likewise, because SSR

388 genotyping error typically involves the conversion of heterozygotes to homozygotes, it too  
389 induces a heterozygote deficit. In our simulation, a decline in observed heterozygosity with  
390 increasing error inflated the inbreeding coefficient  $F = 1 - \frac{H_o}{H_e}$ . As error increased, the  
391 heterozygote deficit  $D = \frac{H_o - H_e}{H_e}$  likewise increased (since D is the additive inverse of F). Thus  
392 error produces an inbreeding-like signature in data sets, which magnifies the Wahlund effect and,  
393 as a byproduct, inflates the level of genetic subdivision, causing increased signal (Supplementary  
394 Figure 2).

395         If this sort of signal amplification is important we would expect model factors  $\Delta F$  (the  
396 change in inbreeding between unmodified and modified data due to error), and/or  $\Delta G$ 'st (the  
397 change in genetic subdivision) to drive the positive relationship between error and accuracy.  
398 Some evidence supports this. When accuracy was measured using the partition distance ratio,  
399  $\Delta G$ 'st was the second-most important model effect for all INSTRUCT modes, explaining 3-10%  
400 of the variation (Supplementary Table 3). For 'INSTRUCT no admixture',  $\Delta F$  was the most  
401 important.  $\Delta G$ 'st and  $\Delta F$  were also important model effects for STRUCTURAMA, explaining 5-  
402 15% of the variation in the partition distance ratio. However, for STRUCTURAMA, the  
403 overwhelming weight of evidence was that  $\Delta K$ , the difference in the number of populations  
404 inferred, was the primary driver of the response. Thus the improvement in accuracy observed for  
405 STRUCTURAMA seems to have an additional underlying cause.

406         STRUCTURAMA uses a Dirichlet process prior to simultaneously infer K and individual  
407 assignment. A "Dirichlet process" describes a distribution of probability distributions and is a  
408 mathematical construct commonly used as a prior in MCMC procedures to categorize items into  
409 groups when the number of groups is unknown. During progression of the Markov chain in

410 STRUCTURAMA, a critical decision is made for each individual at each step: whether the  
411 individual belongs to an existing cluster or should be assigned to a new cluster. This decision  
412 affects both assignment and the inference of  $K$ . The algorithm proceeds roughly as follows.  
413 First, an individual  $i$  is selected at random from the existing partition and removed. Individual  $i$   
414 is then re-assigned to whichever of the  $K$  clusters it fits best, or to a new cluster, all by itself.  
415 The probability that the individual is re-assigned to an existing cluster,  $k$ , is dependent on the  
416 number of individuals,  $\eta$ , in that cluster (large clusters are more attractive) and the marginal  
417 posterior probability of drawing  $i$ 's genotype from cluster  $k$ . In contrast, the probability of  
418 assigning  $i$  to a new cluster depends on the concentration parameter,  $\alpha$ , of the Dirichlet process  
419 (the higher  $\alpha$  is, the lower the probability that two randomly drawn individuals belong to the  
420 same cluster) and the probability of drawing  $i$ 's genotype from the prior distribution of allele  
421 frequencies, where all alleles are equiprobable.

422 In our unmodified data sets, the deviation from Hardy-Weinberg equilibrium is due to  
423 subpopulation structure plus some minor, random effects of the coalescent. However, when  
424 error is introduced, part of the deviation is then derived from the inbreeding-like effect of SSR  
425 error. With error, the relative probability of assigning an individual to an existing cluster versus  
426 a new cluster decreases—data with heterozygote deficit, by definition, do not fit nicely into a  
427 Hardy-Weinberg scenario—and, accordingly, it becomes more likely that an individual will be  
428 assigned to a new cluster, thereby increasing  $K$ . Consistent with this expectation,  $K$  increased  
429 significantly with error (Figure 5a). When more clusters are available in which to distribute  
430 individuals, more correct inferences can be made (equivalently, the number of correct inferences  
431 possible is suppressed for low levels of error). Consequently, performance improves with  
432 increasing error primarily because  $K$  increases. While convenient, the STRUCTURAMA

433 approach for defining  $K$  may be incautious. Miller and Harrison (2014) argued that Dirichlet  
434 process models should not be used to infer the number of components.

435 INSTRUCT uses the Deviance Information Criterion (DIC) to select the best  $K$  value  
436 from a user-defined range. In the present case, a model with  $K=50$  will usually have a higher  
437 likelihood than one with, say,  $K=4$ , but that does not necessarily mean it is better, it may merely  
438 be overfit. The DIC, like other model selection statistics, deals with this by imposing a penalty  
439 on the likelihood for adding parameters. The DIC value is, essentially, the mean likelihood  
440 across MCMC draws at stationarity, penalized for increasing  $K$ . The  $K$  value that minimizes the  
441 DIC across the range is deemed optimal. This method for choosing  $K$  appears largely insensitive  
442 to the level of error, and in this sense seems preferable to the Dirichlet process used by  
443 STRUCTURAMA. There is currently no consensus on the best procedure to estimate the  
444 number of groups in a finite mixture. Until the basic mathematical issues are resolved, the  
445 biological problem of estimating  $K$  for population structure inference will remain more craft than  
446 science.

447 *Impact of error on the estimation of admixture proportions.* Using an admixture model and  
448 STRUCTURE, Gao *et al.* (2007) showed that inbreeding causes two spurious results:  
449 exaggerated levels of admixture and elevated likelihoods for higher  $K$  values. Falush *et al.*  
450 (2003, p. 1572) predicted this: "...situations that might cause additional populations to be  
451 inferred by STRUCTURE...include a significant frequency of inbreeding, cryptic relatedness  
452 within the sample, or the presence of null alleles." The implication is that  
453 heterozygote-deficit-inducing factors other than population subdivision might promote the  
454 inference of more clusters, or more admixture among clusters, than is actually the case. For  
455 'INSTRUCT admixture', the relative level of inferred admixture increased with error, and

456 likelihoods were elevated for higher K values (Figure 5b,d). This did not, however, translate into  
457 the inference of higher K values under the DIC ( $p > 0.19$ ).

458         To reduce artifacts from conflation of signal types, Gao *et al.* (2007) relaxed the  
459 assumption of Hardy-Weinberg equilibrium to estimate an inbreeding parameter alongside  
460 subpopulation membership. Relative to ‘INSTRUCT admixture,’ the relationship between error  
461 and admixture for ‘INSTRUCT inbreeding’ remained positive, but that between K and the model  
462 likelihood was reversed:  $LnL$  decreased as K increased (Figure 5c,d). Thus the inbreeding  
463 model of Gao *et al.* (2007) compensates in some ways for genotyping error, but does not resolve  
464 the issue of admixture overestimation. The effects of error might be mitigated by explicitly  
465 modeling it as an additional parameter that alters Hardy-Weinberg expectations at each locus  
466 independently, distinct from the inbreeding coefficient estimated by INSTRUCT, which alters  
467 expectations uniformly across loci.

468         Whether over-estimation of admixture proportions due to genotyping error is a problem  
469 in real data sets is unknown, but the potential exists. False confidence in our understanding of  
470 the partitioning of genetic variation in nature notwithstanding, artifactually-elevated admixture  
471 estimates could have important economic implications, in endangered species management or  
472 genomewide association analysis, for example. Newer forms of data, like SNPs, are not immune  
473 to the problem. High throughput genotyping and next generation sequencing approaches vary in  
474 their capacity to accurately identify heterozygotes (Harismendy *et al.* 2009; Skotte *et al.* 2013),  
475 sometimes defaulting to the homozygous condition, akin to SSR error.

476 *Recommendations.* Missing data exert a greater negative effect on the inference of population  
477 structure than typical SSR genotyping errors. As missing data increase, the number of correct  
478 clusters recovered decreases and the number of incorrect clusters increases. In order to

479 efficiently produce SSR data sets for inferring population structure we recommend limiting the  
480 percent of a matrix that contains missing data to ~2%, unless a greater amount can be justified  
481 based on the particular hypotheses under examination. This will allow researchers to retain most  
482 of the resolving power of their data while not incurring the extra costs associated with  
483 completing a data matrix. For analyses reliant on simple distance metrics, we recommend  
484 limiting the error rate to ~4% of scored genotypes. Model-based population structure inference  
485 methods handle genotyping error well. We recommend the use of admixture models to infer  
486 cluster membership, but caution that admixture estimates may be artificially elevated.

487

488

#### ACKNOWLEDGEMENTS

489 This study was conceived during a graduate seminar at Colorado State University organized by  
490 Mark P. Simmons, who we thank for critical reading of the manuscript. This research used  
491 resources from the Open Science Grid (supported by the National Science Foundation and the  
492 U.S. Department of Energy's Office of Science), the iPlant Collaborative (National Science  
493 Foundation grant #DBI-0735191. URL: [www.iplantcollaborative.org](http://www.iplantcollaborative.org)), and the HTCCondor group  
494 in the Department of Computer Sciences at the University of Wisconsin-Madison. We thank  
495 Nirav Merchant, Suchandra Thapa, Greg Thain, John Fonner and Nicole Hopkins for helping us  
496 find spare compute cycles and optimize HTC strategies at iPlant, the OSG, and UW.

497

498

#### REFERENCES

- 499 Amos W (2006) The hidden value of missing genotypes. *Molecular Biology and Evolution*, 23,  
500 1995–1996.
- 501 Björklund M (2005) A method for adjusting allele frequencies in the case of microsatellite allele  
502 drop-out. *Molecular Ecology Notes*, 5, 676–679.
- 503 Bonin A, Bellemain E, Bronken Eidesen P et al. (2004) How to track and assess genotyping  
504 errors in population genetics studies. *Molecular Ecology*, 13, 3261–3273.
- 505 Broquet T, Petit E (2004) Quantifying genotyping errors in noninvasive population genetics.  
506 *Molecular Ecology*, 13, 3601–3608.
- 507 Brumfield RT, Beerli P, Nickerson DA, Edwards SV (2003) The utility of single nucleotide  
508 polymorphisms in inferences of population history. *Trends in Ecology & Evolution*, 18,  
509 249–256.
- 510 Buchan JC, Archie EA, Van Horn RC, Moss CJ, Alberts SC (2005) Locus effects and sources of  
511 error in noninvasive genotyping. *Molecular Ecology Notes*, 5, 680–683.
- 512 Butler JM (2005) Constructing STR multiplex assays. In: *Forensic DNA Typing Protocols*, pp.  
513 53–65. Springer.
- 514 Carlsson J (2008) Effects of microsatellite null alleles on assignment testing. *Journal of Heredity*,  
515 99, 616–623.

- 516 Chakraborty R, Kimmel M, Stivers DN, Davison LJ, Deka R (1997) Relative mutation rates at  
517 di-, tri-, and tetranucleotide microsatellite loci. *Proceedings of the National Academy of*  
518 *Sciences*, 94, 1041–1046.
- 519 Chambers GK, MacAvoy ES (2000) Microsatellites: consensus and controversy. *Comparative*  
520 *Biochemistry and Physiology Part B: Biochemistry and Molecular Biology*, 126, 455–  
521 476.
- 522 Chapuis M-P, Estoup A (2006) Microsatellite null alleles and estimation of population  
523 differentiation. *Molecular Biology and Evolution*, 24, 621–631.
- 524 Chapuis M-P, Lecoq M, Michalakis Y, Loiseau A, Sword GA, Piry S, Estoup A (2008) Do  
525 outbreaks affect genetic population structure? A worldwide survey in *Locusta migratoria*,  
526 a pest plagued by microsatellite null alleles. *Molecular Ecology*, 17, 3640–3653.
- 527 Charon I, Deneœud L, Guœnoche A, Hudry O (2006) Maximum transfer distance between  
528 partitions. *Journal of Classification*, 23, 103–121.
- 529 Choi SC, Hey J (2011) Joint inference of population assignment and demographic history.  
530 *Genetics*, 189, 561–577.
- 531 Corander J, Waldmann P, Sillanpää MJ (2003) Bayesian analysis of genetic differentiation  
532 between populations. *Genetics*, 163, 367–374.
- 533 Dakin EE, Avise JC (2004) Microsatellite null alleles in parentage analysis. *Heredity*, 93, 504–  
534 509.
- 535 Dallas JF (1992) Estimation of microsatellite mutation rates in recombinant inbred strains of  
536 mouse. *Mammalian Genome*, 3, 452–456.
- 537 Davidson JF, Fox R, Harris DD, Lyons-Abbott S, Loeb LA (2003) Insertion of the T3 DNA  
538 polymerase thioredoxin binding domain enhances the processivity and fidelity of Taq  
539 DNA polymerase. *Nucleic Acids Research*, 31, 4702–4709.
- 540 Dawson KJ, Belkhir K (2001) A Bayesian approach to the identification of panmictic  
541 populations and the assignment of individuals. *Genetical Research*, 78, 59–77.
- 542 DeWoody J, Nason JD, Hipkins VD (2006) Mitigating scoring errors in microsatellite data from  
543 wild populations. *Molecular Ecology Notes*, 6, 951–957.
- 544 Estoup A, Garnery L, Solignac M, Cornuet J-M (1995) Microsatellite variation in honey bee  
545 (*Apis mellifera* L.) populations: hierarchical genetic structure and test of the infinite  
546 allele and stepwise mutation models. *Genetics*, 140, 679–695).
- 547 Evanno G, Regnaut S, Goudet J (2005) Detecting the number of clusters of individuals using the  
548 software STRUCTURE: a simulation study. *Molecular Ecology*, 14, 2611–2620.
- 549 Ewing G, Hermisson J (2010) MSMS: a coalescent simulation program including recombination,  
550 demographic structure and selection at a single locus. *Bioinformatics*, 26, 2064–2065.
- 551 Falush D, Stephens M, Pritchard JK (2003) Inference of population structure using multilocus  
552 genotype data: linked loci and correlated allele frequencies. *Genetics*, 164, 1567–1587.
- 553 Gaggiotti OE, Lange O, Rassmann K, Gliddon C (1999) A comparison of two indirect methods  
554 for estimating average levels of gene flow using microsatellite data. *Molecular Ecology*,  
555 8, 1513–1520.
- 556 Gagneux P, Boesch C, Woodruff DS (1997) Microsatellite scoring errors associated with  
557 noninvasive genotyping based on nuclear DNA amplified from shed hair. *Molecular*  
558 *Ecology*, 6, 861–868.
- 559 Gao H, Bryc K, Bustamante CD (2011) On Identifying the Optimal Number of Population  
560 Clusters via the Deviance Information Criterion. *PLoS ONE*, 6, e21014.

- 561 Gao H, Williamson S, Bustamante CD (2007) A Markov Chain Monte Carlo approach for joint  
562 inference of population structure and inbreeding rates from multilocus genotype data.  
563 *Genetics*, 176, 1635–1651.
- 564 Gardner MG, Fitch AJ, Bertozzi T, Lowe AJ (2011) Rise of the machines - recommendations for  
565 ecologists when using next generation sequencing for microsatellite development.  
566 *Molecular Ecology Resources*, 11, 1093–1101.
- 567 Glaubitz JC, Rhodes OE, DeWoody JA (2003) Prospects for inferring pairwise relationships with  
568 single nucleotide polymorphisms. *Molecular Ecology*, 12, 1039–1047.
- 569 Glover K, Hansen M, Lien S et al. (2010) A comparison of SNP and STR loci for delineating  
570 population structure and performing individual genetic assignment. *Bmc Genetics*, 11, 2.
- 571 Guichoux E, Lagache L, Wagner S et al. (2011) Current trends in microsatellite genotyping.  
572 *Molecular Ecology Resources*, 11, 591–611.
- 573 Gusfield D (2002) Partition-distance: a problem and class of perfect graphs arising in clustering.  
574 *Information Processing Letters*, 82, 159–164.
- 575 Hackett CA, Broadfoot LB (2003) Effects of genotyping errors, missing values and segregation  
576 distortion in molecular marker data on the construction of linkage maps. *Heredity*, 90,  
577 33–38.
- 578 Hall N, Mercer L, Phillips D, Shaw J, Anderson AD (2012) Maximum likelihood estimation of  
579 individual inbreeding coefficients and null allele frequencies. *Genetics Research*, 94,  
580 151–161.
- 581 Harismendy O, Ng PC, Strausberg RL et al. (2009) Evaluation of next generation sequencing  
582 platforms for population targeted sequencing studies. *Genome Biol*, 10, R32.
- 583 Hedrick PW (2005) A standardized genetic differentiation measure. *Evolution*, 59, 1633–1638.
- 584 Hoffman JI, Amos W (2005) Microsatellite genotyping errors: detection approaches, common  
585 sources and consequences for paternal exclusion. *Molecular Ecology*, 14, 599–612.
- 586 Holleley C, Geerts P (2009) Multiplex Manager 1.0: a cross-platform computer program that  
587 plans and optimizes multiplex PCR. *BioTechniques*, 46, 511–517.
- 588 Huelsenbeck JP, Andolfatto P (2007) Inference of population structure under a Dirichlet process  
589 model. *Genetics*, 175, 1787–1802.
- 590 Kalinowski ST (2002) How many alleles per locus should be used to estimate genetic distances?  
591 *Heredity*, 88, 62–65.
- 592 Kalinowski ST, Taper ML, Marshall TC (2007) Revising how the computer program cervus  
593 accommodates genotyping error increases success in paternity assignment. *Molecular  
594 Ecology*, 16, 1099–1106.
- 595 Levinson G, Gutman GA (1987) Slipped-strand mispairing: a major mechanism for DNA  
596 sequence evolution. *Molecular biology and evolution*, 4, 203–221.
- 597 Liu N, Chen L, Wang S, Oh C, Zhao H (2005) Comparison of single-nucleotide polymorphisms  
598 and microsatellites in inference of population structure. *BMC Genetics*, 6, S26.
- 599 Lynch M (1990) The similarity index and DNA fingerprinting. *Molecular Biology and  
600 Evolution*, 7, 478–484.
- 601 Miller JW, Harrison MT (2014) Inconsistency of Pitman-Yor process mixtures for the number of  
602 components. *Journal of Machine Learning Research*, 15, 3333–3370.
- 603 Murray V, Monchawin C, England PR (1993) The determination of the sequences present in the  
604 shadow bands of a dinucleotide repeat PCR. *Nucleic Acids Research*, 21, 2395–2398.
- 605 Nielsen R, Wakeley J (2001) Distinguishing migration from isolation: a Markov chain Monte  
606 Carlo approach. *Genetics*, 158, 885–896.



- 607 O'Connell M, Danzmann RG, Cornuet J-M, Wright J, Ferguson MM (1997) Differentiation of  
608 rainbow trout (*Oncorhynchus mykiss*) populations in Lake Ontario and the evaluation of  
609 the stepwise mutation and infinite allele mutation models using microsatellite variability.  
610 *Canadian Journal of Fisheries and Aquatic Sciences*, 54, 1391–1399.
- 611 Olejniczak M, Krzyzosiak WJ (2006) Genotyping of simple sequence repeat factors implicated  
612 in shadow band generation revisited. *Electrophoresis*, 27, 3724–3734.
- 613 Paetkau D, Waits LP, Clarkson PL, Craighead L, Strobeck C (1997) An empirical evaluation of  
614 genetic distance statistics using microsatellite data from bear (*Ursidae*) populations.  
615 *Genetics*, 143, 1943–1957.
- 616 Peel D, Waples RS, Macbeth GM, Do C, Ovenden JR (2013) Accounting for missing data in the  
617 estimation of contemporary genetic effective population size ( $N_e$ ). *Molecular Ecology*  
618 *Resources*, 13, 243–253.
- 619 Pompanon F, Bonin A, Bellemain E, Taberlet P (2005) Genotyping errors: causes, consequences  
620 and solutions. *Nature Reviews Genetics*, 6, 847–846.
- 621 Pritchard JK, Stephens M, Donnelly P (2000) Inference of population structure using multilocus  
622 genotype data. *Genetics*, 155, 945–959.
- 623 Raymond M, Rousset F (1995) GENEPOP (version 1.2): population genetics software for exact  
624 tests and ecumenicism. *Journal of Heredity*, 86, 248–249.
- 625 Reeves PA, Panella LW, Richards CM (2012) Retention of agronomically important variation in  
626 germplasm core collections: implications for allele mining. *Theoretical and Applied*  
627 *Genetics*, 124, 1155–1171.
- 628 Reeves PA, Richards CM (2009) Accurate inference of subtle population structure (and other  
629 genetic discontinuities) using principal coordinates. *PLoS One*, 4.
- 630 Rohlf FJ (2008) NTSYSpc: Numerical Taxonomy System, ver. 2.11x. Exeter, Setauket, NY.
- 631 Seddon JM, Parker HG, Ostrander EA, Ellegren H (2005) SNPs in ecological and conservation  
632 studies: a test in the Scandinavian wolf population. *Molecular Ecology*, 14, 503–511.
- 633 Sefc KM, Payne RB, Sorenson MD (2003) Microsatellite amplification from museum feather  
634 samples: effects of fragment size and template concentration on genotyping errors. *The*  
635 *Auk*, 120, 982.
- 636 Shinde D, Lai Y, Sun F, Arnheim N (2003) Taq DNA polymerase slippage mutation rates  
637 measured by PCR and quasi-likelihood analysis: (CA/GT)<sub>n</sub> and (A/T)<sub>n</sub> microsatellites.  
638 *Nucleic Acids Research*, 31, 974–980.
- 639 Skotte L, Korneliussen TS, Albrechtsen A (2013) Estimating individual admixture proportions  
640 from next generation sequencing data. *Genetics*, 195, 693–702.
- 641 Sunnucks P (2000) Efficient genetic markers for population biology. *Trends in Ecology &*  
642 *Evolution*, 15, 199–203.
- 643 Taberlet P, Griffin S, Goossens B et al. (1996) Reliable genotyping of samples with very low  
644 DNA quantities using PCR. *Nucleic Acids Research*, 24, 3189–3194.
- 645 Van Oosterhout C, Hutchinson WF, Wills DPM, Shipley P (2004) MICRO-CHECKER: software  
646 for identifying and correcting genotyping errors in microsatellite data. *Molecular Ecology*  
647 *Notes*, 4, 535–538.
- 648 Vigouroux Y, Jaqueth JS, Matsuoka Y et al. (2002) Rate and pattern of mutation at microsatellite  
649 loci in maize. *Molecular Biology and Evolution*, 19, 1251–1260.
- 650 Wahlund S (1928) Zusammensetzung von Populationen und Korrelationserscheinungen vom  
651 Standpunkt der Vererbungslehre aus betrachtet. *Hereditas*, 11, 65–106.

652 Wang J, Santure AW (2009) Parentage and sibship inference from multilocus genotype data  
653 under polygamy. *Genetics*, 181, 1579–1594.  
654 Wattier R, Engel CR, Saumitou-Laprade P, Valero M (1998) Short allele dominance as a source  
655 of heterozygote deficiency at microsatellite loci: experimental evidence at the  
656 dinucleotide locus Gv1CT in *Gracilaria gracilis* (Rhodophyta). *Molecular Ecology*, 7,  
657 1569–1573.

#### 658 DATA ACCESSIBILITY

659 Computer programs used to simulate missing data and genotyping error are available from the  
660 authors.  
661

#### 662 AUTHOR CONTRIBUTIONS

663 Designed research, all authors. Ran analyses, all authors. Analyzed results, PAR. Wrote  
664 computer programs, PAR. Wrote the manuscript, all authors.  
665

#### 666 FIGURE LEGENDS

667 Figure 1. Some complex population structures generated by coalescent simulation, visualized  
668 using principal coordinate analysis. Top row, high population subdivision ( $G'_{st} = 0.99$ ); middle  
669 row, intermediate ( $G'_{st} = 0.5$ ); bottom row, low ( $G'_{st} = 0.01$ ).  
670

671 Figure 2. Accuracy of population structure inference for unmodified data sets. X-axis measures  
672 population subdivision, Y-axis shows the proportion of correctly inferred populations out of 50  
673 possible (black), and the false discovery rate (grey). a) INSTRUCT no admixture; b)  
674 INSTRUCT admixture; c) INSTRUCT inbreeding; d) STRUCTURAMA; e) Neighbor-joining;  
675 f) PCOMC. False discovery rate not calculable for neighbor-joining.  
676

677 Figure 3. Effect of missing data and error on clustering accuracy using the performance ratio.  
678 a,g) INSTRUCT no admixture; b,h) INSTRUCT admixture; c,i) INSTRUCT inbreeding; d,j)  
679 STRUCTURAMA; e,k) Neighbor-joining; f,l) PCOMC. For visual clarity, points are mean  
680 values binned with an interval width of 0.01. Error bars indicate SEM. Statistics were  
681 calculated without binning. Dotted curves mark the 95% confidence interval on the slope of the  
682 regression. Grey shaded area is the 95% confidence interval on the slope of the regression for  
683 the false discovery rate ratio. False discovery rate not calculable for neighbor-joining. The  
684 range of values in f) is truncated because principal coordinate analysis can accept limited missing  
685 data.  
686

687 Figure 4. Effect of error on clustering accuracy using the partition distance ratio. a) INSTRUCT  
688 no admixture; b) INSTRUCT admixture; c) INSTRUCT inbreeding; d) STRUCTURAMA.  
689 Dotted curves mark the 95% confidence interval on the slope of the regression. For clarity, a  
690 total of 8 outlying points have been omitted from the plots, but were included in the regression.  
691

692 Figure 5. a) As genotyping error increases the optimal value for K is elevated under a Dirichlet  
693 process prior using STRUCTURAMA. b) The level of inferred admixture, as measured by the  
694 Shannon index, increases with error for 'INSTRUCT admixture'. c) The upward bias in the  
695 admixture estimate is not corrected by using 'INSTRUCT inbreeding'. d) Error causes the  
696 likelihood to be elevated for higher values of K, plateauing after  $K > 10$ . This effect is reversed  
697

698 by using a model that compensates for inbreeding. Black line, ‘INSTRUCT admixture’; grey  
699 line, ‘INSTRUCT inbreeding’.

700

701

702

703

TABLES

704 Table 1. Regression analysis of clustering accuracy, measured with the performance ratio.

705

| Data set         | Method           | n <sub>obs</sub> | m <sup>a</sup> | b <sup>b</sup> | R <sup>2</sup> <sub>adj</sub> | p <sup>c</sup> |
|------------------|------------------|------------------|----------------|----------------|-------------------------------|----------------|
| Missing          | INSTRUCT         | 188              | -1.96          | 1.02           | 0.11                          | 2.0E-06***     |
|                  | no admixture     |                  |                |                |                               |                |
|                  | INSTRUCT         | 133              | -1.97          | 0.95           | 0.08                          | 6.6E-04**      |
|                  | admixture        |                  |                |                |                               |                |
|                  | INSTRUCT         | 129              | -1.84          | 0.87           | 0.04                          | 1.8E-02        |
|                  | inbreeding       |                  |                |                |                               |                |
| Error            | STRUCTURAMA      | 106              | -3.46          | 0.96           | 0.27                          | 6.4E-09***     |
|                  | Neighbor-joining | 473              | -3.13          | 0.84           | 0.24                          | 1.1E-30***     |
|                  | PCOMC            | 63               | -3.19          | 0.84           | 8.7E-03                       | 0.22           |
|                  | INSTRUCT         | 190              | 0.41           | 0.90           | 0.01                          | 8.7E-02        |
|                  | no admixture     |                  |                |                |                               |                |
|                  | INSTRUCT         | 134              | 1.19           | 0.84           | 0.02                          | 3.8E-02        |
|                  | admixture        |                  |                |                |                               |                |
|                  | INSTRUCT         | 130              | 1.36           | 0.91           | 9.5E-03                       | 0.14           |
|                  | inbreeding       |                  |                |                |                               |                |
|                  | STRUCTURAMA      | 128              | 1.05           | 0.79           | 0.11                          | 8.7E-05***     |
| Neighbor-joining | 473              | -1.86            | 0.96           | 0.13           | 1.5E-16***                    |                |
| PCOMC            | 185              | -1.67            | 0.95           | 0.04           | 6.2E-03*                      |                |

706 <sup>a</sup>Slope with Y-intercept fixed at 1.

707 <sup>b</sup>Y intercept for natural regression.

708 <sup>c</sup>\*significant at Holm-Bonferroni corrected  $\alpha=0.05$ ; \*\*  $\alpha=0.01$ ; \*\*\*  $\alpha=0.001$ .

709  
710  
711

Table 2. Multiple regression analysis and linear model likelihoods.

| Data set                                                                                                                        | Method                   | Model                                                                                          | R <sup>2</sup> <sub>adj</sub>                                                                  | β       | SE     | p <sup>a</sup> | K        | AIC      | Δ <sub>i</sub> <sup>b</sup> | w <sub>i</sub> <sup>c</sup> |      |
|---------------------------------------------------------------------------------------------------------------------------------|--------------------------|------------------------------------------------------------------------------------------------|------------------------------------------------------------------------------------------------|---------|--------|----------------|----------|----------|-----------------------------|-----------------------------|------|
| Missing                                                                                                                         | INSTRUCT<br>no admixture | % missing { β <sub>0</sub> +β <sub>1</sub> (x <sub>1</sub> ) }                                 | 0.11                                                                                           | -1.99   | 0.41   | 3.2E-6***      | 2        | -301.76  | 1.01                        | 0.38                        |      |
|                                                                                                                                 |                          | Clumping parameter { β <sub>0</sub> +β <sub>2</sub> (x <sub>2</sub> ) }                        | 0.02                                                                                           | 0.02    | 0.01   | 0.09           | 2        | -282.69  | 20.08                       | 2.7E-05                     |      |
|                                                                                                                                 |                          | Combined { β <sub>0</sub> +β <sub>1</sub> (x <sub>1</sub> )+β <sub>2</sub> (x <sub>2</sub> ) } | 0.12                                                                                           |         |        | 2.9E-6***      | 3        | -302.77  | 0                           | 0.62                        |      |
|                                                                                                                                 |                          | INSTRUCT<br>admixture                                                                          | % missing { β <sub>0</sub> +β <sub>1</sub> (x <sub>1</sub> ) }                                 | 0.08    | -1.51  | 0.48           | 1.8E-3*  | 2        | -216.92                     | 2.24                        | 0.24 |
|                                                                                                                                 |                          |                                                                                                | Clumping parameter { β <sub>0</sub> +β <sub>2</sub> (x <sub>2</sub> ) }                        | 0.04    | 0.03   | 0.01           | 0.04     | 2        | -211.19                     | 7.97                        | 0.01 |
|                                                                                                                                 |                          |                                                                                                | Combined { β <sub>0</sub> +β <sub>1</sub> (x <sub>1</sub> )+β <sub>2</sub> (x <sub>2</sub> ) } | 0.1     |        |                | 3.9E-4** | 3        | -219.16                     | 0                           | 0.74 |
|                                                                                                                                 |                          | INSTRUCT<br>inbreeding                                                                         | % missing { β <sub>0</sub> +β <sub>1</sub> (x <sub>1</sub> ) }                                 | 0.04    | -0.99  | 0.46           | 0.03     | 2        | -226.42                     | 2.24                        | 0.20 |
|                                                                                                                                 |                          |                                                                                                | Clumping parameter { β <sub>0</sub> +β <sub>2</sub> (x <sub>2</sub> ) }                        | 0.03    | 0.02   | 0.01           | 0.04     | 2        | -226.05                     | 2.61                        | 0.17 |
|                                                                                                                                 |                          |                                                                                                | Combined { β <sub>0</sub> +β <sub>1</sub> (x <sub>1</sub> )+β <sub>2</sub> (x <sub>2</sub> ) } | 0.06    |        |                | 7.6E-3   | 3        | -228.66                     | 0                           | 0.63 |
|                                                                                                                                 | STRUCTURAMA              | % missing { β <sub>0</sub> +β <sub>1</sub> (x <sub>1</sub> ) }                                 | 0.27                                                                                           | -3.30   | 0.51   | 2.6E-9***      | 2        | -184.27  | 2.80                        | 0.20                        |      |
|                                                                                                                                 |                          | Clumping parameter { β <sub>0</sub> +β <sub>2</sub> (x <sub>2</sub> ) }                        | 0.02                                                                                           | -0.03   | 0.01   | 0.03           | 2        | -152.4   | 34.67                       | 2.4E-08                     |      |
|                                                                                                                                 |                          | Combined { β <sub>0</sub> +β <sub>1</sub> (x <sub>1</sub> )+β <sub>2</sub> (x <sub>2</sub> ) } | 0.30                                                                                           |         |        | 5.0E-9***      | 3        | -187.07  | 0                           | 0.80                        |      |
|                                                                                                                                 | Neighbor-joining         | % missing { β <sub>0</sub> +β <sub>1</sub> (x <sub>1</sub> ) }                                 | 0.24                                                                                           | -2.2    | 0.18   | 1.4E-30***     | 2        | -1066.74 | 14.94                       | 0.00                        |      |
|                                                                                                                                 |                          | Clumping parameter { β <sub>0</sub> +β <sub>2</sub> (x <sub>2</sub> ) }                        | 0.04                                                                                           | 0.02    | 4.7E-3 | 4.1E-5***      | 2        | -950.623 | 131.06                      | 3.5E-29                     |      |
|                                                                                                                                 |                          | Combined { β <sub>0</sub> +β <sub>1</sub> (x <sub>1</sub> )+β <sub>2</sub> (x <sub>2</sub> ) } | 0.27                                                                                           |         |        | 3.7E-33***     | 3        | -1081.68 | 0                           | 1.00                        |      |
|                                                                                                                                 | PCOMC                    | % missing { β <sub>0</sub> +β <sub>1</sub> (x <sub>1</sub> ) }                                 | 8.7E-3                                                                                         | -1.77   | 1.26   | 0.17           | 2        | -98.52   | 0                           | 0.50                        |      |
|                                                                                                                                 |                          | Clumping parameter { β <sub>0</sub> +β <sub>2</sub> (x <sub>2</sub> ) }                        | -0.01                                                                                          | -0.01   | 0.02   | 0.43           | 2        | -97.15   | 1.37                        | 0.25                        |      |
|                                                                                                                                 |                          | Combined { β <sub>0</sub> +β <sub>1</sub> (x <sub>1</sub> )+β <sub>2</sub> (x <sub>2</sub> ) } | 2.8E-3                                                                                         |         |        | 0.34           | 3        | -97.19   | 1.33                        | 0.25                        |      |
|                                                                                                                                 | Error                    | INSTRUCT<br>no admixture                                                                       | Null percent { β <sub>0</sub> +β <sub>1</sub> (x <sub>1</sub> ) }                              | -4.5E-3 | 0.14   | 0.86           | 0.87     | 2        | -208.04                     | 5.57                        | 0.05 |
|                                                                                                                                 |                          |                                                                                                | Drop out percent { β <sub>0</sub> +β <sub>2</sub> (x <sub>2</sub> ) }                          | 0.02    | 2.07   | 0.88           | 0.02     | 2        | -213.61                     | 0                           | 0.78 |
|                                                                                                                                 |                          |                                                                                                | Stutter percent { β <sub>0</sub> +β <sub>3</sub> (x <sub>3</sub> ) }                           | -3.4E-3 | -1.26  | 2.51           | 0.61     | 2        | -208.25                     | 5.36                        | 0.05 |
| Combined { β <sub>0</sub> +β <sub>1</sub> (x <sub>1</sub> )+β <sub>2</sub> (x <sub>2</sub> )+β <sub>3</sub> (x <sub>3</sub> ) } |                          |                                                                                                | 0.16                                                                                           |         |        | 0.12           | 4        | -209.92  | 3.69                        | 0.12                        |      |
| }                                                                                                                               |                          |                                                                                                |                                                                                                |         |        |                |          |          |                             |                             |      |
| }                                                                                                                               |                          |                                                                                                |                                                                                                |         |        |                |          |          |                             |                             |      |
| }                                                                                                                               |                          |                                                                                                |                                                                                                |         |        |                |          |          |                             |                             |      |

|                     |                                                               |         |        |      |            |   |          |       |         |
|---------------------|---------------------------------------------------------------|---------|--------|------|------------|---|----------|-------|---------|
| INSTRUCT admixture  |                                                               |         |        |      |            |   |          |       |         |
|                     | Null percent { $\beta_0+\beta_1(x_1)$ }                       | -2.3E-3 | 0.99   | 1.49 | 0.51       | 2 | -51.1    | 6.06  | 0.03    |
|                     | Drop out percent { $\beta_0+\beta_2(x_2)$ }                   | 0.04    | 3.90   | 1.44 | 7.6E-3     | 2 | -57.16   | 0     | 0.59    |
|                     | Stutter percent { $\beta_0+\beta_3(x_3)$ }                    | 5.3E-3  | -6.45  | 4.49 | 0.15       | 2 | -52.12   | 5.04  | 0.05    |
|                     | Combined { $\beta_0+\beta_1(x_1)+\beta_2(x_2)+\beta_3(x_3)$ } | 0.05    |        |      | 0.03       | 4 | -55.98   | 1.18  | 0.33    |
| INSTRUCT inbreeding |                                                               |         |        |      |            |   |          |       |         |
|                     | Null percent { $\beta_0+\beta_1(x_1)$ }                       | -7.6E-3 | -0.71  | 1.82 | 0.70       | 2 | 0.24     | 11.09 | 3.1E-03 |
|                     | Drop out percent { $\beta_0+\beta_2(x_2)$ }                   | 0.05    | 5.35   | 1.68 | 1.8E-3*    | 2 | -7.91    | 2.94  | 0.18    |
|                     | Stutter percent { $\beta_0+\beta_3(x_3)$ }                    | 0.03    | -15.29 | 5.82 | 9.7E-3     | 2 | -4.54    | 6.31  | 0.03    |
|                     | Combined { $\beta_0+\beta_1(x_1)+\beta_2(x_2)+\beta_3(x_3)$ } | 0.09    |        |      | 2.1E-3*    | 4 | -10.85   | 0     | 0.78    |
| STRUCTURAMA         |                                                               |         |        |      |            |   |          |       |         |
|                     | Null percent { $\beta_0+\beta_1(x_1)$ }                       | 1.0E-3  | 1.26   | 0.83 | 0.13       | 2 | -200.45  | 15.10 | 3.5E-04 |
|                     | Drop out percent { $\beta_0+\beta_2(x_2)$ }                   | 0.10    | 3.10   | 0.80 | 1.8E-4**   | 2 | -214.15  | 1.40  | 0.33    |
|                     | Stutter percent { $\beta_0+\beta_3(x_3)$ }                    | 0.02    | 5.12   | 2.60 | 0.05       | 2 | -202.97  | 12.58 | 1.2E-03 |
|                     | Combined { $\beta_0+\beta_1(x_1)+\beta_2(x_2)+\beta_3(x_3)$ } | 0.13    |        |      | 2.0E-4**   | 4 | -215.55  | 0     | 0.67    |
| Neighbor-joining    |                                                               |         |        |      |            |   |          |       |         |
|                     | Null percent { $\beta_0+\beta_1(x_1)$ }                       | 0.03    | -1.31  | 0.29 | 1.2E-5***  | 2 | -951.524 | 76.95 | 2.0E-17 |
|                     | Drop out percent { $\beta_0+\beta_2(x_2)$ }                   | 0.08    | -1.67  | 0.26 | 5.7E-10*** | 2 | -975.431 | 53.04 | 3.0E-12 |
|                     | Stutter percent { $\beta_0+\beta_3(x_3)$ }                    | 0.07    | -6.69  | 0.99 | 4.2E-11*** | 2 | -971.313 | 57.16 | 3.9E-13 |
|                     | Combined { $\beta_0+\beta_1(x_1)+\beta_2(x_2)+\beta_3(x_3)$ } | 0.18    |        |      | 1.2E-20*** | 4 | -1028.47 | 0     | 1.00    |
| PCOMC               |                                                               |         |        |      |            |   |          |       |         |
|                     | Null percent { $\beta_0+\beta_1(x_1)$ }                       | 2.0E-3  | -1.19  | 0.74 | 0.11       | 2 | -274.075 | 5.05  | 0.05    |
|                     | Drop out percent { $\beta_0+\beta_2(x_2)$ }                   | 0.02    | -1.49  | 0.66 | 0.03       | 2 | -277.417 | 1.71  | 0.26    |
|                     | Stutter percent { $\beta_0+\beta_3(x_3)$ }                    | 8.5E-3  | -5.15  | 2.45 | 0.04       | 2 | -275.274 | 3.85  | 0.09    |
|                     | Combined { $\beta_0+\beta_1(x_1)+\beta_2(x_2)+\beta_3(x_3)$ } | 0.04    |        |      | 0.02       | 4 | -279.128 | 0     | 0.61    |

712

713 <sup>a</sup>\*Significant at Holm-Bonferroni corrected  $\alpha=0.05$ ; \*\*  $\alpha=0.01$ ; \*\*\*  $\alpha=0.001$ .714 <sup>b</sup>Rescaled Akaike information criterion (AIC).715 <sup>c</sup>Model probability.

## SUPPLEMENTARY FIGURE LEGENDS

716

717 Supplementary Figure 1. Properties of simulated data sets. a) Frequency of data sets with  
718 differing levels of population subdivision. b) The amount of missing data introduced into data  
719 sets was unrelated to level of population subdivision. c) The frequency of erroneous genotypes  
720 was negatively correlated with population subdivision.

721

722 Supplementary Figure 2. The inbreeding-like effect of SSR genotyping error. a) The level of  
723 apparent inbreeding increases with genotyping error. b, c) The increase in  $F$  is driven by a  
724 decrease in observed heterozygosity rather than an increase in expected heterozygosity, which  
725 decreased significantly, but slightly. d) Error increases the apparent level of population  
726 subdivision, producing a tendency for more accurate assignment of genotypes to clusters as the  
727 amount of error increases.

728

729 Supplementary Table 1. Spearman's rank order correlation of clustering accuracy, measured  
 730 with the partition distance ratio.

731

| Data set    | Method       | $n_{\text{obs}}^a$ | $\rho^{a,b}$ | $p^{a,c}$  | $n_{\text{obs}}^d$ | $\rho^{d,b}$ | $p^{d,c}$  |
|-------------|--------------|--------------------|--------------|------------|--------------------|--------------|------------|
| Missing     | INSTRUCT     | 437                | -0.22        | 2.3E-06*** | 188                | 0.68         | 1.4E-26*** |
|             | no admixture |                    |              |            |                    |              |            |
|             | INSTRUCT     | 356                | -0.23        | 1.1E-05*** | 133                | 0.63         | 2.6E-16*** |
|             | admixture    |                    |              |            |                    |              |            |
| Error       | INSTRUCT     | 357                | -0.11        | 0.03       | 125                | 0.45         | 1.4E-07*** |
|             | inbreeding   |                    |              |            |                    |              |            |
|             | STRUCTURAMA  | 115                | 0.12         | 0.19       | 100                | 0.05         | 0.61       |
|             | INSTRUCT     | 464                | 0.30         | 2.4E-11*** | 190                | 0.51         | 1.0E-13*** |
|             | no admixture |                    |              |            |                    |              |            |
|             | INSTRUCT     | 393                | 0.49         | 4.5E-25*** | 134                | 0.41         | 7.0E-07*** |
|             | admixture    |                    |              |            |                    |              |            |
| INSTRUCT    | 382          | 0.53               | 6.2E-29***   | 130        | 0.46               | 2.7E-08***   |            |
| inbreeding  |              |                    |              |            |                    |              |            |
| STRUCTURAMA | 141          | 0.18               | 0.03         | 115        | 0.57               | 4.4E-11***   |            |

732 <sup>a</sup> Spearman's rank order correlation between percent data set modification and the partition  
 733 distance ratio metric.

734 <sup>b</sup> Spearman's coefficient, rho.

735 <sup>c</sup> \*Significant at Holm-Bonferroni corrected  $\alpha=0.05$ ; \*\*  $\alpha=0.01$ ; \*\*\*  $\alpha=0.001$ .

736 <sup>d</sup> Spearman's rank order correlation between the performance ratio and the partition distance  
 737 ratio.



738 Supplementary Table 2. Multiple regression and likelihood analysis of six competing model effects explaining accuracy of  
 739 model-based clustering methods subject to erroneous data, measured with the performance ratio.  
 740

| Method                 | Model                                                                                                                                                                                                                         | R <sup>2</sup> <sub>adj</sub> | β        | SE   | p <sup>c</sup> | K | AIC     | Δ <sub>i</sub> <sup>d</sup> | w <sub>i</sub> <sup>e</sup> |
|------------------------|-------------------------------------------------------------------------------------------------------------------------------------------------------------------------------------------------------------------------------|-------------------------------|----------|------|----------------|---|---------|-----------------------------|-----------------------------|
| STRUCTURAMA            |                                                                                                                                                                                                                               |                               |          |      |                |   |         |                             |                             |
|                        | % error { β <sub>0</sub> +β <sub>1</sub> (x <sub>1</sub> ) }                                                                                                                                                                  | 0.11                          | 3.16     | 0.95 | 1.2E-03*       | 2 | -215.01 | 32.01                       | 4.4E-08                     |
|                        | Δ APL <sup>a</sup> { β <sub>0</sub> +β <sub>2</sub> (x <sub>2</sub> ) }                                                                                                                                                       | 0.03                          | 0.09     | 0.07 | 0.20           | 2 | -204.35 | 42.67                       | 2.1E-10                     |
|                        | Δ K { β <sub>0</sub> +β <sub>3</sub> (x <sub>3</sub> ) }                                                                                                                                                                      | 0.24                          | 0.10     | 0.02 | 2.6E-08***     | 2 | -235.96 | 11.06                       | 1.6E-03                     |
|                        | Δ G'st { β <sub>0</sub> +β <sub>4</sub> (x <sub>4</sub> ) }                                                                                                                                                                   | -7.8E-03                      | -0.86    | 4.14 | 0.84           | 2 | -199.33 | 47.69                       | 1.7E-11                     |
|                        | Δ p(1) <sup>b</sup> { β <sub>0</sub> +β <sub>5</sub> (x <sub>5</sub> ) }                                                                                                                                                      | 1.7E-03                       | -3.48    | 1.70 | 0.04           | 2 | -200.54 | 46.48                       | 3.2E-11                     |
|                        | Δ F { β <sub>0</sub> +β <sub>6</sub> (x <sub>6</sub> ) }                                                                                                                                                                      | 2.9E-03                       | -1.16    | 0.72 | 0.11           | 2 | -200.7  | 46.32                       | 3.5E-11                     |
|                        | Best 2 { β <sub>0</sub> +β <sub>3</sub> (x <sub>3</sub> )+β <sub>5</sub> (x <sub>5</sub> ) }                                                                                                                                  | 0.28                          |          |      | 6.4E-10***     | 3 | -240.68 | 6.34                        | 1.7E-02                     |
|                        | Best 3 { β <sub>0</sub> +β <sub>1</sub> (x <sub>1</sub> )+β <sub>3</sub> (x <sub>3</sub> )+β <sub>5</sub> (x <sub>5</sub> ) }                                                                                                 | 0.30                          |          |      | 2.0E-10***     | 4 | -244.76 | 2.26                        | 0.13                        |
|                        | Best 4 { β <sub>0</sub> +β <sub>1</sub> (x <sub>1</sub> )+β <sub>3</sub> (x <sub>3</sub> )+β <sub>4</sub> (x <sub>4</sub> )+β <sub>5</sub> (x <sub>5</sub> ) }                                                                | 0.32                          |          |      | 1.4E-10***     | 5 | -247.02 | 0                           | 0.40                        |
|                        | Best 5 { β <sub>0</sub> +β <sub>1</sub> (x <sub>1</sub> )+β <sub>2</sub> (x <sub>2</sub> )+β <sub>3</sub> (x <sub>3</sub> )+β <sub>4</sub> (x <sub>4</sub> )+β <sub>5</sub> (x <sub>5</sub> ) }                               | 0.32                          |          |      | 2.8E-10***     | 6 | -246.68 | 0.34                        | 0.33                        |
|                        | All { β <sub>0</sub> +β <sub>1</sub> (x <sub>1</sub> )+β <sub>2</sub> (x <sub>2</sub> )+β <sub>3</sub> (x <sub>3</sub> )+β <sub>4</sub> (x <sub>4</sub> )+β <sub>5</sub> (x <sub>5</sub> )+β <sub>6</sub> (x <sub>6</sub> ) } | 0.32                          |          |      | 1.1E-09***     | 7 | -244.73 | 2.29                        | 0.13                        |
| INSTRUCT, no admixture |                                                                                                                                                                                                                               |                               |          |      |                |   |         |                             |                             |
|                        | % error { β <sub>0</sub> +β <sub>1</sub> (x <sub>1</sub> ) }                                                                                                                                                                  | 0.01                          | 2.62     | 1.12 | 0.02           | 2 | -210.86 | 12.65                       | 5.5E-04                     |
|                        | Δ APL <sup>a</sup> { β <sub>0</sub> +β <sub>2</sub> (x <sub>2</sub> ) }                                                                                                                                                       | 0.04                          | -1.2E-03 | 0.09 | 0.99           | 2 | -216.59 | 6.92                        | 9.6E-03                     |
|                        | Δ K { β <sub>0</sub> +β <sub>3</sub> (x <sub>3</sub> ) }                                                                                                                                                                      | -3.6E-03                      | 1.0E-03  | 0.00 | 0.64           | 2 | -208.21 | 15.30                       | 1.4E-04                     |
|                        | Δ G'st { β <sub>0</sub> +β <sub>4</sub> (x <sub>4</sub> ) }                                                                                                                                                                   | 0.03                          | -2.47    | 2.00 | 0.22           | 2 | -214.90 | 8.61                        | 4.1E-03                     |
|                        | Δ p(1) <sup>b</sup> { β <sub>0</sub> +β <sub>5</sub> (x <sub>5</sub> ) }                                                                                                                                                      | 0.02                          | -5.02    | 3.62 | 0.17           | 2 | -212.23 | 11.28                       | 1.1E-03                     |
|                        | Δ F { β <sub>0</sub> +β <sub>6</sub> (x <sub>6</sub> ) }                                                                                                                                                                      | 0.02                          | -1.03    | 0.78 | 0.19           | 2 | -212.64 | 10.87                       | 1.3E-03                     |
|                        | Best 2 { β <sub>0</sub> +β <sub>1</sub> (x <sub>1</sub> )+β <sub>4</sub> (x <sub>4</sub> ) }                                                                                                                                  | 0.06                          |          |      | 6.2E-04*       | 3 | -220.91 | 2.60                        | 0.08                        |
|                        | Best 3 { β <sub>0</sub> +β <sub>1</sub> (x <sub>1</sub> )+β <sub>4</sub> (x <sub>4</sub> )+β <sub>6</sub> (x <sub>6</sub> ) }                                                                                                 | 0.08                          |          |      | 2.9E-04*       | 4 | -223.11 | 0.40                        | 0.25                        |
|                        | Best 4 { β <sub>0</sub> +β <sub>1</sub> (x <sub>1</sub> )+β <sub>4</sub> (x <sub>4</sub> )+β <sub>5</sub> (x <sub>5</sub> )+β <sub>6</sub> (x <sub>6</sub> ) }                                                                | 0.09                          |          |      | 2.9E-04*       | 5 | -223.51 | 0                           | 0.30                        |

|                                                                                                 |          |          |         |          |   |         |      |         |
|-------------------------------------------------------------------------------------------------|----------|----------|---------|----------|---|---------|------|---------|
| Best 5 { $\beta_0+\beta_1(x_1)+\beta_3(x_3)+\beta_4(x_4)+\beta_5(x_5)+\beta_6(x_6)$ }           | 0.09     |          |         | 4.0E-04* | 6 | -223.08 | 0.44 | 0.25    |
| All { $\beta_0+\beta_1(x_1)+\beta_2(x_2)+\beta_3(x_3)+\beta_4(x_4)+\beta_5(x_5)+\beta_6(x_6)$ } | 0.09     |          |         | 8.7E-04* | 7 | -221.30 | 2.21 | 0.10    |
| INSTRUCT, admixture                                                                             |          |          |         |          |   |         |      |         |
| % error { $\beta_0+\beta_1(x_1)$ }                                                              | 0.02     | 5.18     | 2.71    | 0.06     | 2 | -54.77  | 0.22 | 0.19    |
| $\Delta$ APL <sup>a</sup> { $\beta_0+\beta_2(x_2)$ }                                            | 0.02     | 0.04     | 0.16    | 0.78     | 2 | -53.84  | 1.15 | 0.12    |
| $\Delta$ K { $\beta_0+\beta_3(x_3)$ }                                                           | -7.6E-03 | -1.9E-04 | 7.7E-03 | 0.98     | 2 | -50.41  | 4.59 | 0.02    |
| $\Delta$ G'st { $\beta_0+\beta_4(x_4)$ }                                                        | -3.0E-03 | 8.87     | 7.02    | 0.21     | 2 | -51.02  | 3.97 | 0.03    |
| $\Delta$ p(1) <sup>b</sup> { $\beta_0+\beta_5(x_5)$ }                                           | -4.2E-03 | -6.48    | 4.27    | 0.13     | 2 | -50.85  | 4.14 | 0.03    |
| $\Delta$ F { $\beta_0+\beta_6(x_6)$ }                                                           | -4.6E-03 | -3.32    | 1.82    | 0.07     | 2 | -50.80  | 4.19 | 0.03    |
| Best 2 { $\beta_0+\beta_1(x_1)+\beta_6(x_6)$ }                                                  | 0.03     |          |         | 0.04     | 3 | -54.99  | 0    | 0.21    |
| Best 3 { $\beta_0+\beta_1(x_1)+\beta_5(x_5)+\beta_6(x_6)$ }                                     | 0.04     |          |         | 0.05     | 4 | -54.43  | 0.56 | 0.16    |
| Best 4 { $\beta_0+\beta_1(x_1)+\beta_4(x_4)+\beta_5(x_5)+\beta_6(x_6)$ }                        | 0.04     |          |         | 0.05     | 5 | -54.28  | 0.71 | 0.15    |
| Best 5 { $\beta_0+\beta_1(x_1)+\beta_2(x_2)+\beta_4(x_4)+\beta_5(x_5)+\beta_6(x_6)$ }           | 0.04     |          |         | 0.09     | 6 | -52.36  | 2.63 | 0.06    |
| All { $\beta_0+\beta_1(x_1)+\beta_2(x_2)+\beta_3(x_3)+\beta_4(x_4)+\beta_5(x_5)+\beta_6(x_6)$ } | 0.03     |          |         | 0.14     | 7 | -50.36  | 4.63 | 0.02    |
| INSTRUCT, inbreeding                                                                            |          |          |         |          |   |         |      |         |
| % error { $\beta_0+\beta_1(x_1)$ }                                                              | 9.5E-03  | 3.44     | 3.58    | 0.34     | 2 | -1.99   | 0.44 | 0.16    |
| $\Delta$ APL <sup>a</sup> { $\beta_0+\beta_2(x_2)$ }                                            | 9.2E-03  | -0.05    | 0.21    | 0.80     | 2 | -1.95   | 0.48 | 0.15    |
| $\Delta$ K { $\beta_0+\beta_3(x_3)$ }                                                           | -3.0E-03 | 0.01     | 0.01    | 0.33     | 2 | -0.37   | 2.06 | 0.07    |
| $\Delta$ G'st { $\beta_0+\beta_4(x_4)$ }                                                        | -7.3E-03 | 2.68     | 8.98    | 0.77     | 2 | 0.19    | 2.62 | 0.05    |
| $\Delta$ p(1) <sup>b</sup> { $\beta_0+\beta_5(x_5)$ }                                           | 2.5E-03  | -8.53    | 5.50    | 0.12     | 2 | -1.07   | 1.36 | 0.10    |
| $\Delta$ F { $\beta_0+\beta_6(x_6)$ }                                                           | -5.1E-03 | -1.58    | 2.41    | 0.51     | 2 | -0.10   | 2.33 | 0.06    |
| Best 2 { $\beta_0+\beta_1(x_1)+\beta_5(x_5)$ }                                                  | 0.02     |          |         | 0.10     | 3 | -2.43   | 0    | 0.19    |
| Best 3 { $\beta_0+\beta_1(x_1)+\beta_5(x_5)+\beta_6(x_6)$ }                                     | 0.02     |          |         | 0.14     | 4 | -1.38   | 1.05 | 0.11    |
| Best 4 { $\beta_0+\beta_1(x_1)+\beta_3(x_3)+\beta_5(x_5)+\beta_6(x_6)$ }                        | 0.02     |          |         | 0.17     | 5 | -0.34   | 2.09 | 0.07    |
| Best 5 { $\beta_0+\beta_1(x_1)+\beta_3(x_3)+\beta_4(x_4)+\beta_5(x_5)+\beta_6(x_6)$ }           | 0.01     |          |         | 0.27     | 6 | 1.59    | 4.02 | 0.03    |
| All { $\beta_0+\beta_1(x_1)+\beta_2(x_2)+\beta_3(x_3)+\beta_4(x_4)+\beta_5(x_5)+\beta_6(x_6)$ } | 4.2E-03  |          |         | 0.37     | 7 | 3.52    | 5.95 | 9.9E-03 |

741 <sup>a</sup>Mean number of alleles per locus  
742 <sup>b</sup>Mean private allele frequency  
743 <sup>c</sup>\*significant at Holm-Bonferroni corrected  $\alpha=0.05$ ; \*\*  $\alpha=0.01$ ; \*\*\*  $\alpha=0.001$ .  
744 <sup>d</sup>Rescaled AIC.  
745 <sup>e</sup>Model probability.

746  
747

748 **Supplementary Table 3. Multiple regression and likelihood analysis of six competing model effects explaining accuracy of**  
749 **model-based clustering methods subject to erroneous data, measured with the partition distance ratio metric.**

750

| Method                        | Model                                                                                           | $R^2_{adj}$ | $\beta$  | SE      | $p^c$      | K | AIC     | $\Delta_i^d$ | $w_i^e$ |
|-------------------------------|-------------------------------------------------------------------------------------------------|-------------|----------|---------|------------|---|---------|--------------|---------|
| <b>STRUCTURAMA</b>            |                                                                                                 |             |          |         |            |   |         |              |         |
|                               | % error { $\beta_0+\beta_1(x_1)$ }                                                              | 0.04        | -0.78    | 0.72    | 0.28       | 2 | -245.03 | 83.80        | 2.4E-19 |
|                               | $\Delta$ APL <sup>a</sup> { $\beta_0+\beta_2(x_2)$ }                                            | 6.8E-03     | -0.01    | 0.05    | 0.84       | 2 | -238.05 | 90.78        | 7.3E-21 |
|                               | $\Delta$ K { $\beta_0+\beta_3(x_3)$ }                                                           | 0.43        | 0.12     | 0.01    | 1.2E-15*** | 2 | -318.23 | 10.60        | 1.9E-03 |
|                               | $\Delta$ G'st { $\beta_0+\beta_4(x_4)$ }                                                        | 0.05        | -1.94    | 3.15    | 0.54       | 2 | -246.64 | 82.19        | 5.4E-19 |
|                               | $\Delta$ p(1) <sup>b</sup> { $\beta_0+\beta_5(x_5)$ }                                           | 0.01        | -0.13    | 1.37    | 0.92       | 2 | -240.54 | 88.29        | 2.6E-20 |
|                               | $\Delta$ F { $\beta_0+\beta_6(x_6)$ }                                                           | 0.15        | 1.51     | 0.56    | 7.6E-03    | 2 | -261.90 | 66.93        | 1.1E-15 |
|                               | Best 2 { $\beta_0+\beta_3(x_3)+\beta_6(x_6)$ }                                                  | 0.48        |          |         | 1.9E-20*** | 3 | -328.83 | 0            | 0.38    |
|                               | Best 3 { $\beta_0+\beta_1(x_1)+\beta_3(x_3)+\beta_6(x_6)$ }                                     | 0.48        |          |         | 6.8E-20*** | 4 | -328.75 | 0.07         | 0.37    |
|                               | Best 4 { $\beta_0+\beta_1(x_1)+\beta_3(x_3)+\beta_4(x_4)+\beta_6(x_6)$ }                        | 0.48        |          |         | 4.0E-19*** | 5 | -327.20 | 1.63         | 0.17    |
|                               | Best 5 { $\beta_0+\beta_1(x_1)+\beta_2(x_2)+\beta_3(x_3)+\beta_4(x_4)+\beta_6(x_6)$ }           | 0.47        |          |         | 2.4E-18*** | 6 | -325.24 | 3.59         | 0.06    |
|                               | All { $\beta_0+\beta_1(x_1)+\beta_2(x_2)+\beta_3(x_3)+\beta_4(x_4)+\beta_5(x_5)+\beta_6(x_6)$ } | 0.47        |          |         | 1.3E-17*** | 7 | -323.25 | 5.58         | 0.02    |
| <b>INSTRUCT, no admixture</b> |                                                                                                 |             |          |         |            |   |         |              |         |
|                               | % error { $\beta_0+\beta_1(x_1)$ }                                                              | 0.06        | 1.32     | 0.52    | 0.01       | 2 | -597.36 | 35.52        | 8.0E-09 |
|                               | $\Delta$ APL <sup>a</sup> { $\beta_0+\beta_2(x_2)$ }                                            | -1.5E-03    | 0.10     | 0.05    | 0.07       | 2 | -567.72 | 65.17        | 2.9E-15 |
|                               | $\Delta$ K { $\beta_0+\beta_3(x_3)$ }                                                           | -9.0E-04    | -1.3E-03 | 1.4E-03 | 0.36       | 2 | -567.98 | 64.91        | 3.3E-15 |
|                               | $\Delta$ G'st { $\beta_0+\beta_4(x_4)$ }                                                        | 0.10        | 2.70     | 1.45    | 0.06       | 2 | -616.39 | 16.50        | 1.1E-04 |
|                               | $\Delta$ p(1) <sup>b</sup> { $\beta_0+\beta_5(x_5)$ }                                           | 7.7E-03     | -1.01    | 1.21    | 0.40       | 2 | -571.96 | 60.93        | 2.4E-14 |

|                                                                                                               |          |          |         |            |   |         |        |         |
|---------------------------------------------------------------------------------------------------------------|----------|----------|---------|------------|---|---------|--------|---------|
| $\Delta F \{ \beta_0 + \beta_6(x_6) \}$                                                                       | 0.11     | 0.67     | 0.24    | 0.00       | 2 | -621.13 | 11.76  | 1.2E-03 |
| Best 2 $\{ \beta_0 + \beta_3(x_3) + \beta_4(x_4) \}$                                                          | 0.13     |          |         | 1.8E-14*** | 3 | -629.15 | 3.73   | 6.4E-02 |
| Best 3 $\{ \beta_0 + \beta_3(x_3) + \beta_4(x_4) + \beta_6(x_6) \}$                                           | 0.13     |          |         | 1.8E-14*** | 4 | -630.95 | 1.93   | 0.16    |
| Best 4 $\{ \beta_0 + \beta_1(x_1) + \beta_3(x_3) + \beta_4(x_4) + \beta_6(x_6) \}$                            | 0.14     |          |         | 1.5E-14*** | 5 | -632.89 | 0.00   | 0.41    |
| Best 5 $\{ \beta_0 + \beta_1(x_1) + \beta_2(x_2) + \beta_3(x_3) + \beta_4(x_4) + \beta_6(x_6) \}$             | 0.14     |          |         | 4.5E-14*** | 6 | -631.80 | 1.084  | 0.24    |
| All $\{ \beta_0 + \beta_1(x_1) + \beta_2(x_2) + \beta_3(x_3) + \beta_4(x_4) + \beta_5(x_5) + \beta_6(x_6) \}$ | 0.14     |          |         | 1.4E-13*** | 7 | -630.51 | 2.38   | 0.13    |
| INSTRUCT, admixture                                                                                           |          |          |         |            |   |         |        |         |
| % error $\{ \beta_0 + \beta_1(x_1) \}$                                                                        | 0.12     | 5.79     | 1.04    | 4.7E-08*** | 2 | -45.33  | 6.06   | 1.5E-02 |
| $\Delta APL^a \{ \beta_0 + \beta_2(x_2) \}$                                                                   | 8.0E-03  | 0.24     | 0.11    | 0.03       | 2 | 0.16    | 51.54  | 2.0E-12 |
| $\Delta K \{ \beta_0 + \beta_3(x_3) \}$                                                                       | -1.5E-03 | -3.3E-04 | 5.0E-03 | 0.95       | 2 | 3.85    | 55.24  | 3.1E-13 |
| $\Delta G'st \{ \beta_0 + \beta_4(x_4) \}$                                                                    | 0.05     | 6.24     | 2.93    | 0.03       | 2 | -16.00  | 35.39  | 6.4E-09 |
| $\Delta p(1)^b \{ \beta_0 + \beta_5(x_5) \}$                                                                  | -6.0E-04 | -3.42    | 2.35    | 0.15       | 2 | 3.50    | 54.88  | 3.7E-13 |
| $\Delta F \{ \beta_0 + \beta_6(x_6) \}$                                                                       | 4.7E-03  | -1.21    | 0.49    | 0.01       | 2 | 1.43    | 52.81  | 1.1E-12 |
| Best 2 $\{ \beta_0 + \beta_1(x_1) + \beta_3(x_3) \}$                                                          | 0.13     |          |         | 1.8E-12*** | 3 | -48.28  | 3.11   | 0.07    |
| Best 3 $\{ \beta_0 + \beta_1(x_1) + \beta_2(x_2) + \beta_3(x_3) \}$                                           | 0.13     |          |         | 1.3E-12*** | 4 | -50.62  | 0.7663 | 0.21    |
| Best 4 $\{ \beta_0 + \beta_1(x_1) + \beta_2(x_2) + \beta_3(x_3) + \beta_4(x_4) \}$                            | 0.14     |          |         | 1.9E-12*** | 5 | -51.22  | 0.16   | 0.29    |
| Best 5 $\{ \beta_0 + \beta_1(x_1) + \beta_2(x_2) + \beta_3(x_3) + \beta_4(x_4) + \beta_5(x_5) \}$             | 0.14     |          |         | 3.0E-12*** | 6 | -51.39  | 0.00   | 0.31    |
| All $\{ \beta_0 + \beta_1(x_1) + \beta_2(x_2) + \beta_3(x_3) + \beta_4(x_4) + \beta_5(x_5) + \beta_6(x_6) \}$ | 0.14     |          |         | 1.2E-11*** | 7 | -49.39  | 2.00   | 0.11    |
| INSTRUCT, inbreeding                                                                                          |          |          |         |            |   |         |        |         |
| % error $\{ \beta_0 + \beta_1(x_1) \}$                                                                        | 0.12     | 6.89     | 1.06    | 3.2E-10*** | 2 | -19.01  | 15.98  | 1.8E-04 |
| $\Delta APL^a \{ \beta_0 + \beta_2(x_2) \}$                                                                   | 4.6E-03  | 0.34     | 0.11    | 2.3E-03*   | 2 | 26.42   | 61.40  | 2.5E-14 |
| $\Delta K \{ \beta_0 + \beta_3(x_3) \}$                                                                       | -2.3E-03 | -1.9E-04 | 5.5E-03 | 0.97       | 2 | 29.02   | 64.01  | 6.7E-15 |
| $\Delta G'st \{ \beta_0 + \beta_4(x_4) \}$                                                                    | 0.03     | 6.35     | 3.01    | 0.04       | 2 | 15.03   | 50.02  | 7.3E-12 |
| $\Delta p(1)^b \{ \beta_0 + \beta_5(x_5) \}$                                                                  | -2.5E-03 | -5.82    | 2.41    | 0.02       | 2 | 29.08   | 64.07  | 6.5E-15 |
| $\Delta F \{ \beta_0 + \beta_6(x_6) \}$                                                                       | -5.0E-04 | -1.61    | 0.52    | 2.2E-03*   | 2 | 28.32   | 63.31  | 9.5E-15 |
| Best 2 $\{ \beta_0 + \beta_3(x_3) + \beta_6(x_6) \}$                                                          | 0.13     |          |         | 1.4E-12*** | 3 | -23.86  | 11.13  | 0.00    |

|                                                                                                             |      |            |   |        |      |      |
|-------------------------------------------------------------------------------------------------------------|------|------------|---|--------|------|------|
| Best 3 { $\beta_0 + \beta_1(x_1) + \beta_3(x_3) + \beta_6(x_6)$ }                                           | 0.15 | 6.1E-14*** | 4 | -32.04 | 2.95 | 0.12 |
| Best 4 { $\beta_0 + \beta_1(x_1) + \beta_2(x_2) + \beta_3(x_3) + \beta_6(x_6)$ }                            | 0.15 | 1.0E-13*** | 5 | -32.47 | 2.52 | 0.15 |
| Best 5 { $\beta_0 + \beta_1(x_1) + \beta_2(x_2) + \beta_3(x_3) + \beta_5(x_5) + \beta_6(x_6)$ }             | 0.16 | 5.6E-14*** | 6 | -34.99 | 0    | 0.53 |
| All { $\beta_0 + \beta_1(x_1) + \beta_2(x_2) + \beta_3(x_3) + \beta_4(x_4) + \beta_5(x_5) + \beta_6(x_6)$ } | 0.16 | 2.3E-13*** | 7 | -32.99 | 2.00 | 0.20 |

751 <sup>a</sup>Mean number of alleles per locus

752 <sup>b</sup>Mean private allele frequency

753 <sup>c</sup>\*significant at Holm-Bonferroni corrected  $\alpha=0.05$ ; \*\*  $\alpha=0.01$ ; \*\*\*  $\alpha=0.001$ .

754 <sup>d</sup>Rescaled AIC.

755 <sup>e</sup>Model probability.

756

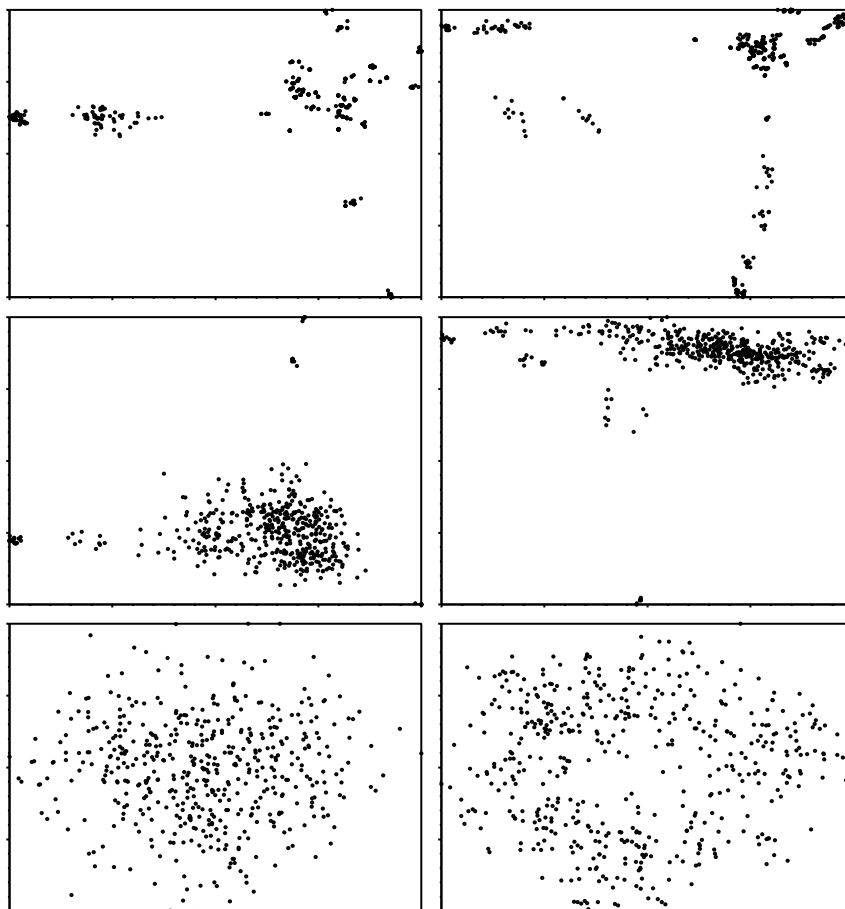

Figure 1.

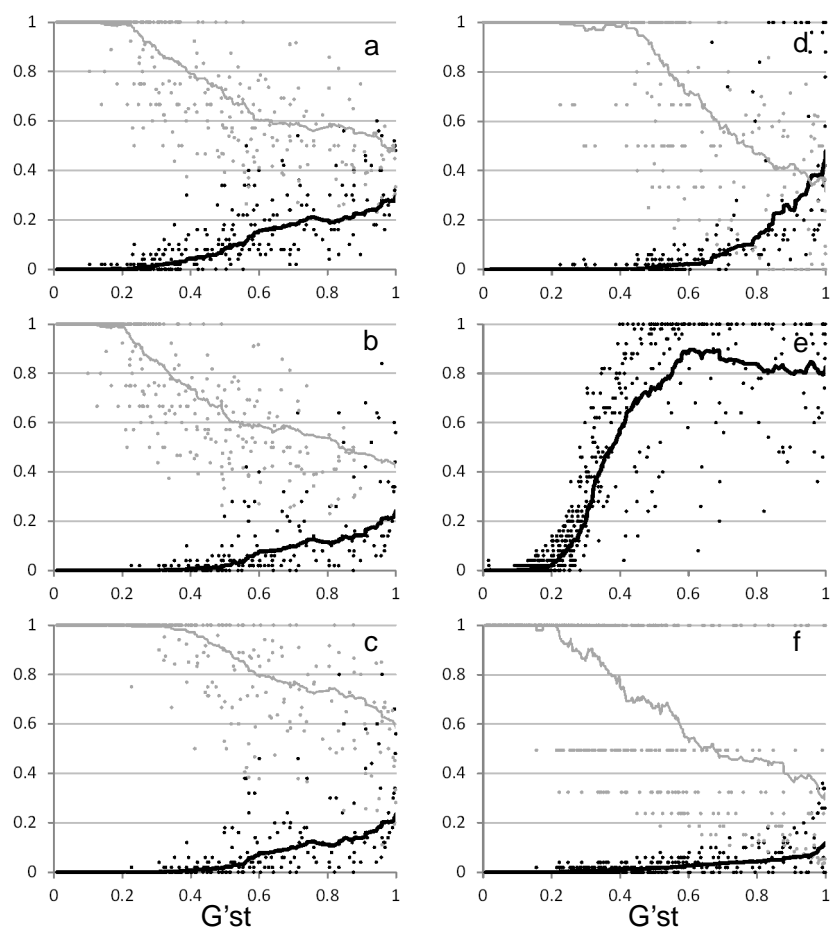

Figure 2.

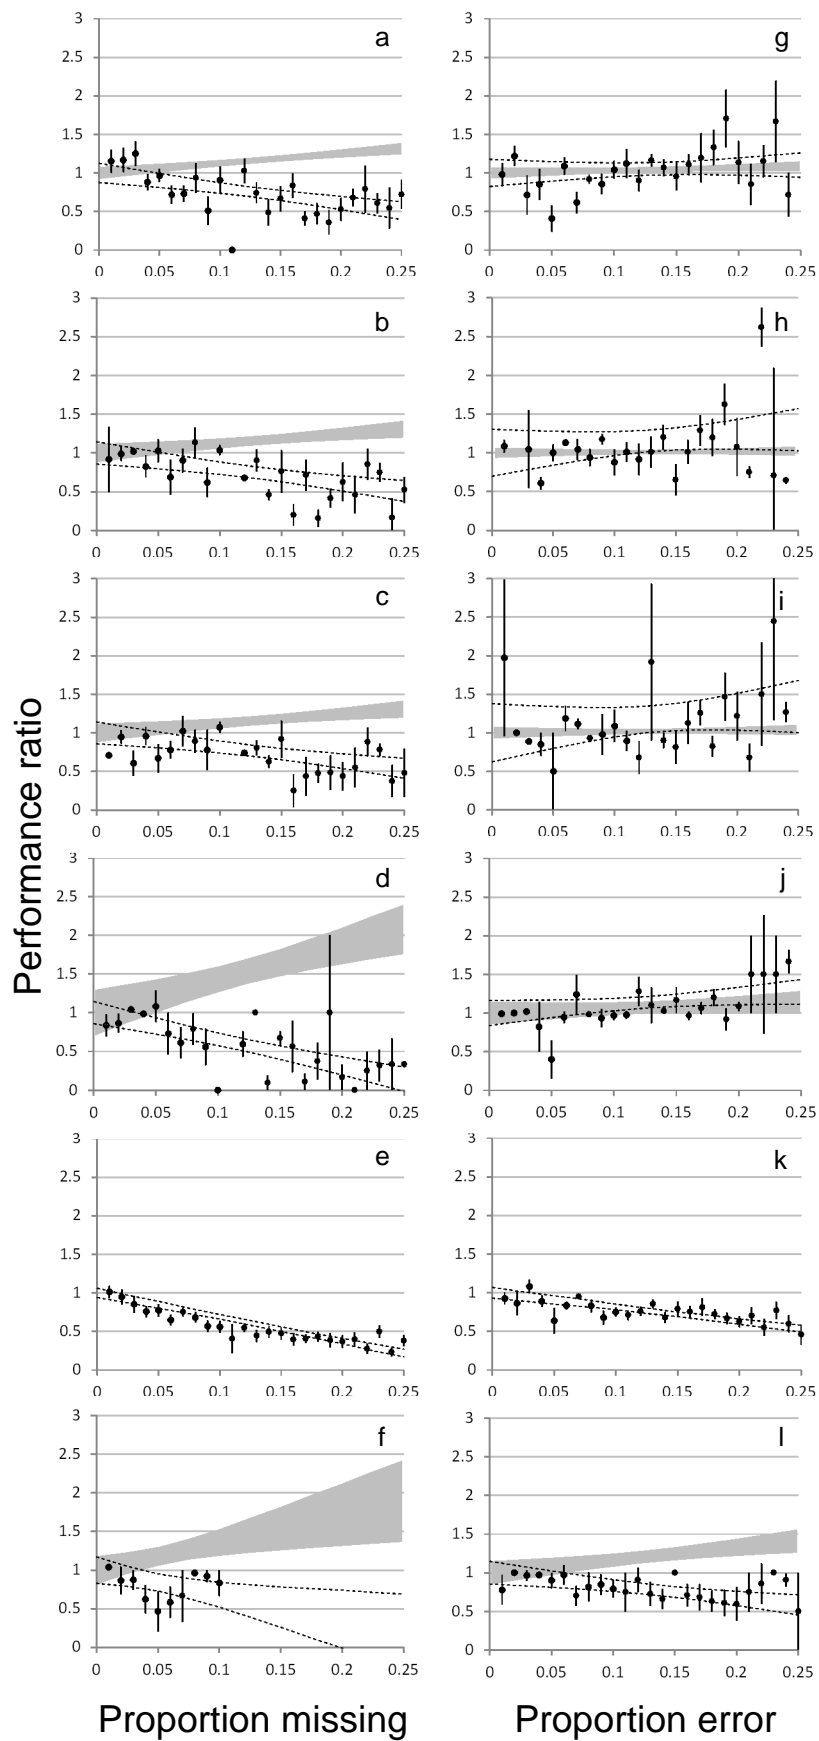

Figure 3.



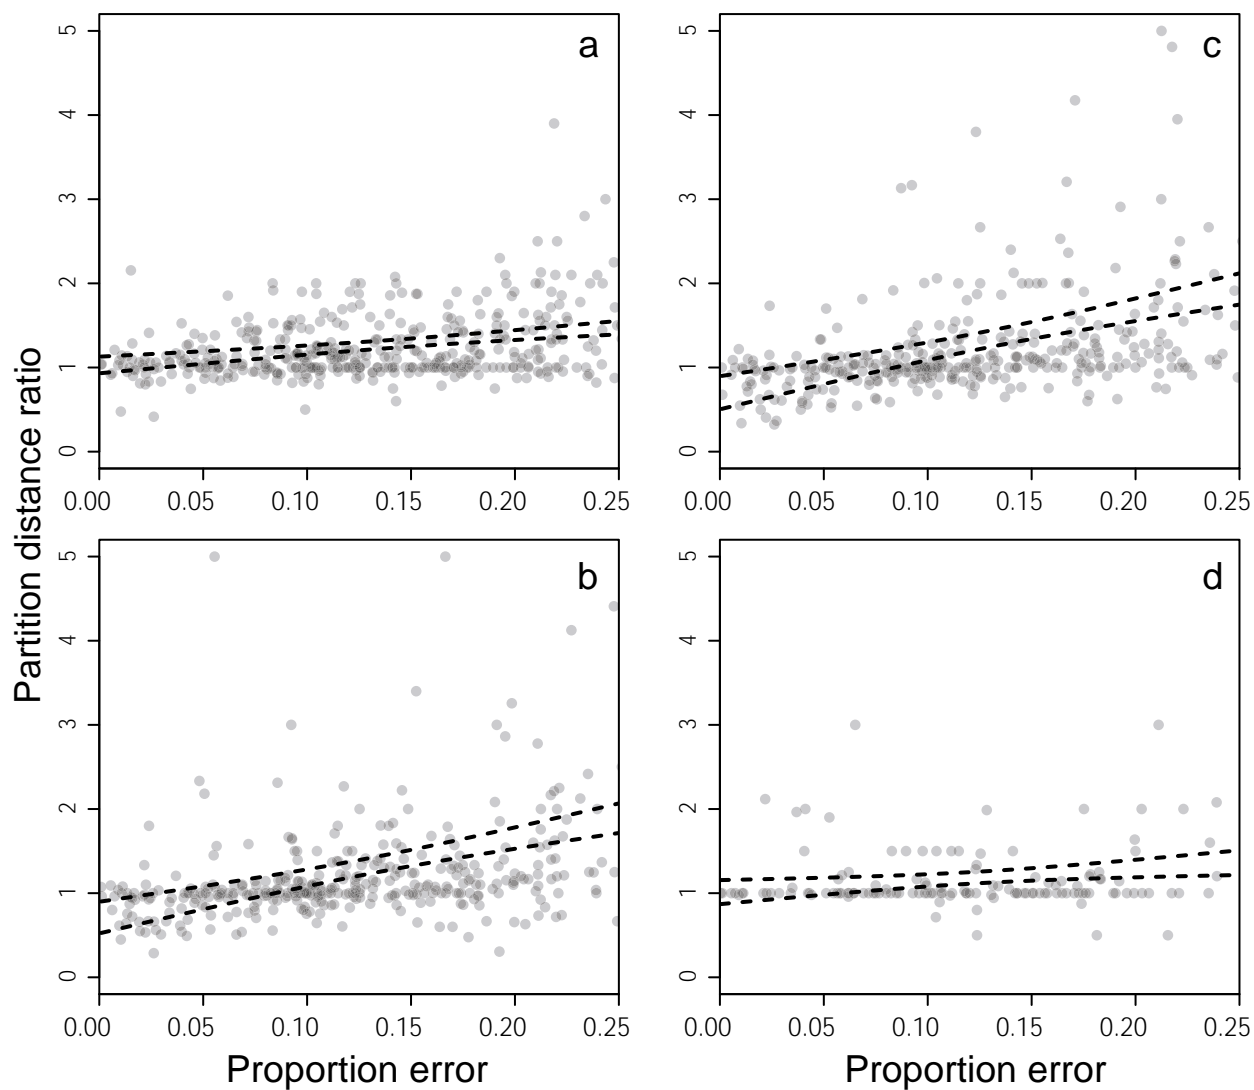

Figure 4.

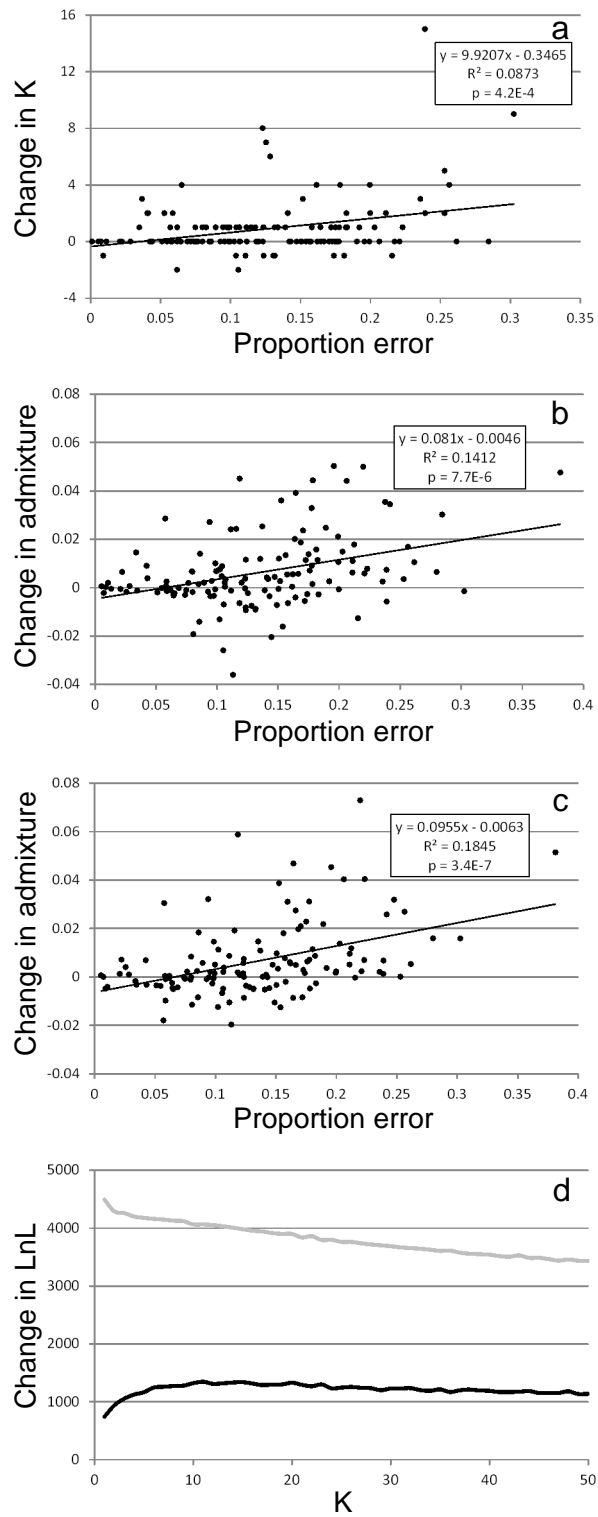

Figure 5.
